# Supplementary material for: Food Sourcing and Diets: Evidence from 45 Low- and Middle-Income Countries
Source: Research Square preprint supplement (doi:10.21203/rs.3.rs-5874611/v1), 2025-03-06
Supplement: Supplementary file 1 [file 6b853b63c53f409cbc785d2a.pdf]

## Supplementary Information

To the paper “Food Sourcing and Diets: Evidence from 45 Low- and Middle-Income Countries”

|    |                                                                                                    |           |
|----|----------------------------------------------------------------------------------------------------|-----------|
| 7  | <b>Table of Contents</b>                                                                           |           |
| 8  | <b>Supplementary Figures .....</b>                                                                 | <b>3</b>  |
| 9  | Figure 1: Sources of food in LMICs.....                                                            | 3         |
| 10 | Figure 2: Consumption and sourcing of 9 food groups. ....                                          | 4         |
| 11 | Figure 3: Consumption and sourcing of food items.....                                              | 5         |
| 12 | Figure 4: Consumption from disaggregated food sources. ....                                        | 6         |
| 13 | Figure 5: Relationship between consumption of nine food groups from different sources and          |           |
| 14 | household income. ....                                                                             | 7         |
| 15 | Figure 6: Relationship between consumption of nine food groups and income by world region. .       | 8         |
| 16 | Figure 7: Consumption and sourcing of 9 food groups by agriculture as primary activity of any      |           |
| 17 | household member.....                                                                              | 9         |
| 18 | Figure 8: Consumption and sourcing of 9 food groups by rural-urban location.....                   | 10        |
| 19 | Figure 10: Relationship between total household dietary diversity and proportion from              |           |
| 20 | purchases and own consumption.....                                                                 | 12        |
| 21 | Figure 11: Food sources using the HDDS versus the MDDW indicator by country. ....                  | 13        |
| 22 | Figure 12: Food item sources by country. ....                                                      | 14        |
| 23 | Figure 13: Development of household dietary diversity and food sources over time. ....             | 15        |
| 24 | Figure 14: Monthly household dietary diversity score (HDDS) and food sources in six countries.     |           |
| 25 | .....                                                                                              | 16        |
| 26 | Figure 15: Food item sources for ten countries by month. ....                                      | 17        |
| 27 | Figure 16: Seasonality of food groups.....                                                         | 18        |
| 28 | Figure 17. Dietary diversity by country, food source, and engagement in agricultural activities. . | 19        |
| 29 | Figure 18: Relationship between dietary diversity from different sources and income by country.    |           |
| 30 | .....                                                                                              | 20        |
| 31 | Figure 19: Relationship between food item diversity from different sources and income by           |           |
| 32 | country. ....                                                                                      | 21        |
| 33 | <b>Supplementary Tables.....</b>                                                                   | <b>22</b> |
| 34 | Table 1: Household dietary diversity and food sources at country-level by rural-urban location     |           |
| 35 | and expenditure terciles. ....                                                                     | 22        |
| 36 | Table 2: Differences in household dietary diversity and food sources by rural-urban location and   |           |
| 37 | expenditure terciles at country-level. ....                                                        | 23        |
| 38 | Table 3: Association between healthy household dietary diversity score (HDDS) and household        |           |
| 39 | demographic and socioeconomic characteristics by world region.....                                 | 24        |
| 40 | Table 4: Data sources for the main analysis. ....                                                  | 26        |
| 41 |                                                                                                    |           |
| 42 |                                                                                                    |           |

Supplementary Figures

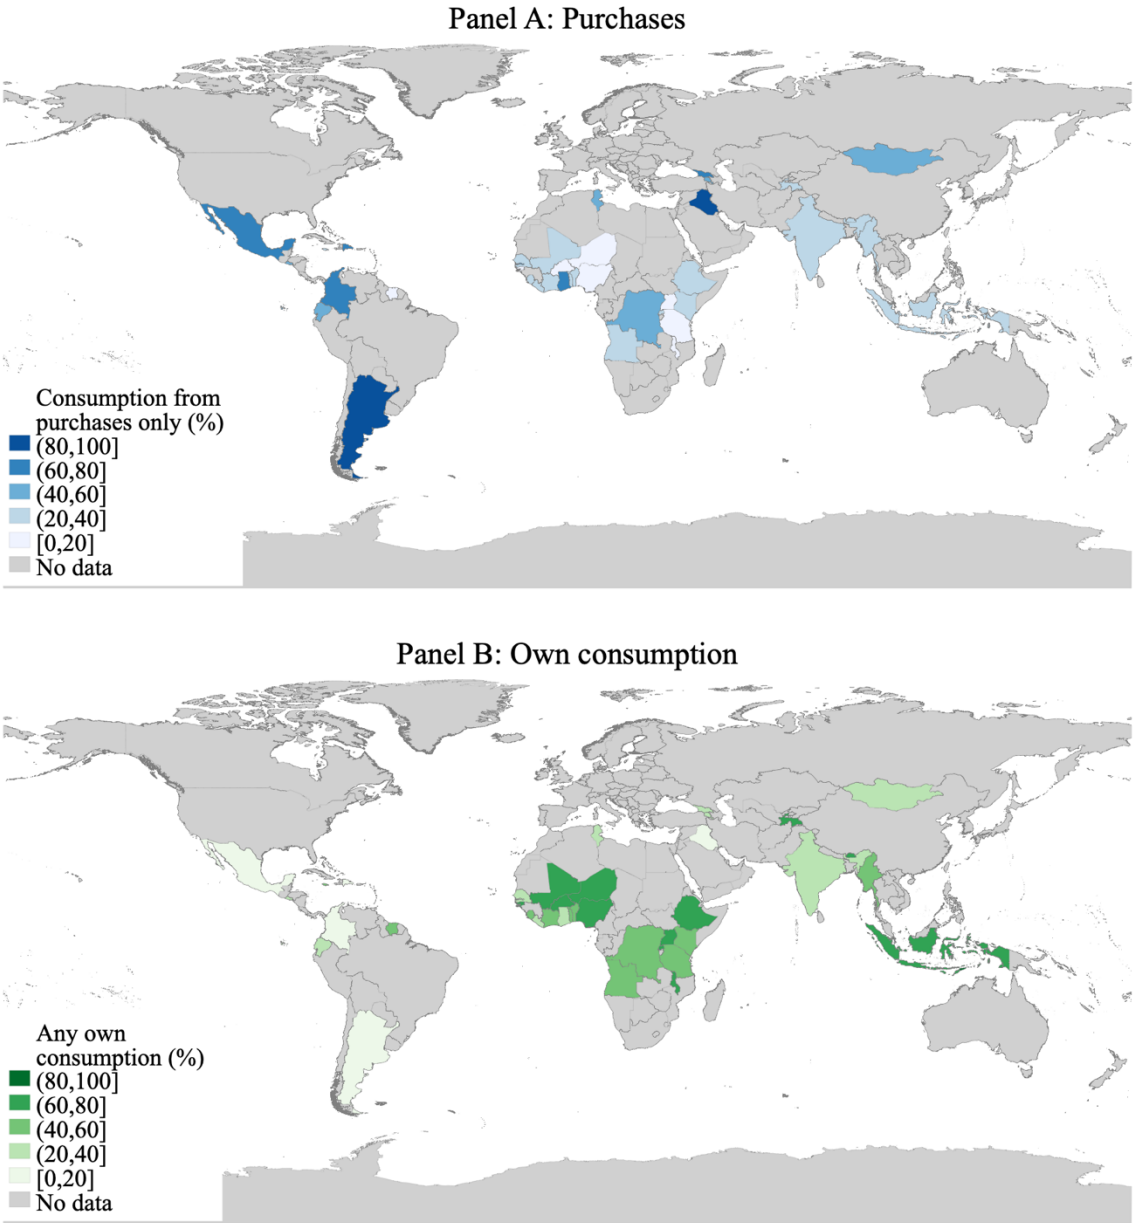

**Figure 1: Sources of food in LMICs.** Panel A depicts the share of households that procure food solely from purchases. Panel B depicts the share of households that are consuming any foods from own production. This information is based on all foods, not only the 9 food groups of the HDDS used in following analyses.

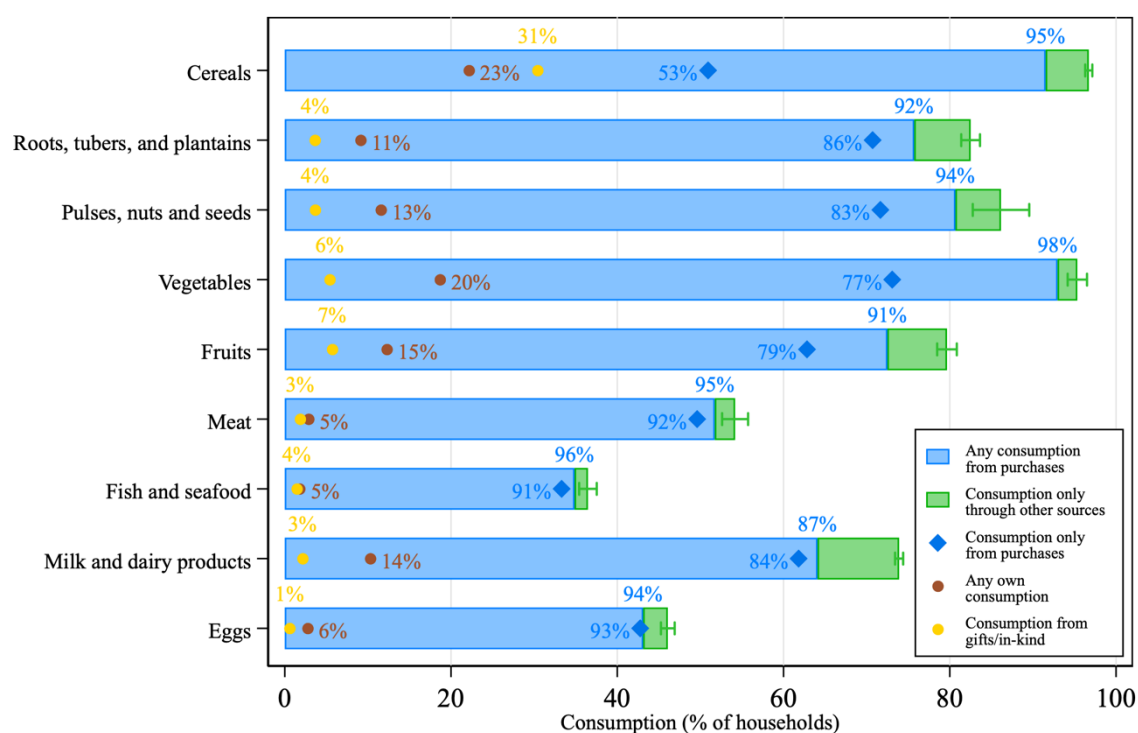

**Figure 2: Consumption and sourcing of 9 food groups.** The total bar length represents the average consumption of that food group along with 95% confidence intervals. The length of the blue bar represents the proportion of households that consume this food group from purchases. The blue diamond depicts the share of households that consume a food group exclusively from purchases and not from any other sources. The brown dots show the proportion consumed from own production, while the yellow dots exhibit the share of households that consume a food group from gifts or in-kind.

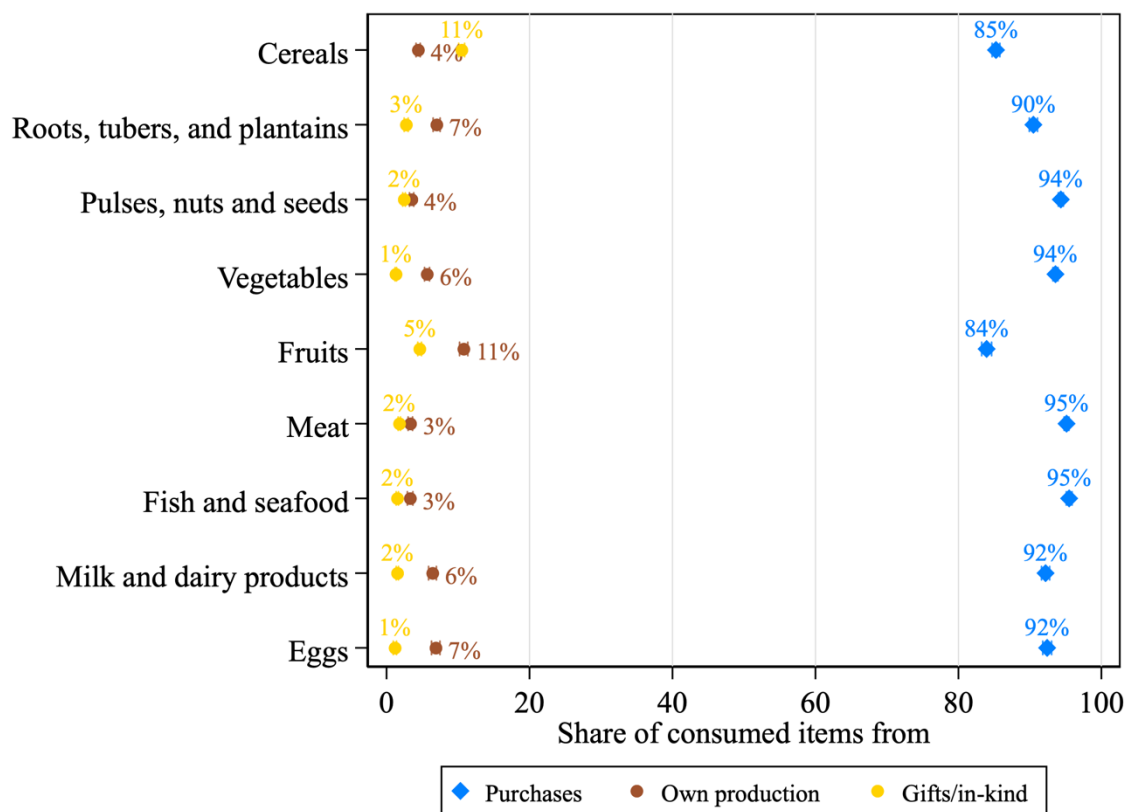

**Figure 3: Consumption and sourcing of food items.** The x-axis represents the proportion of food items consumed by a household from either purchases (blue), own production (brown), or gifts/in-kind (yellow) with 95% confidence intervals.

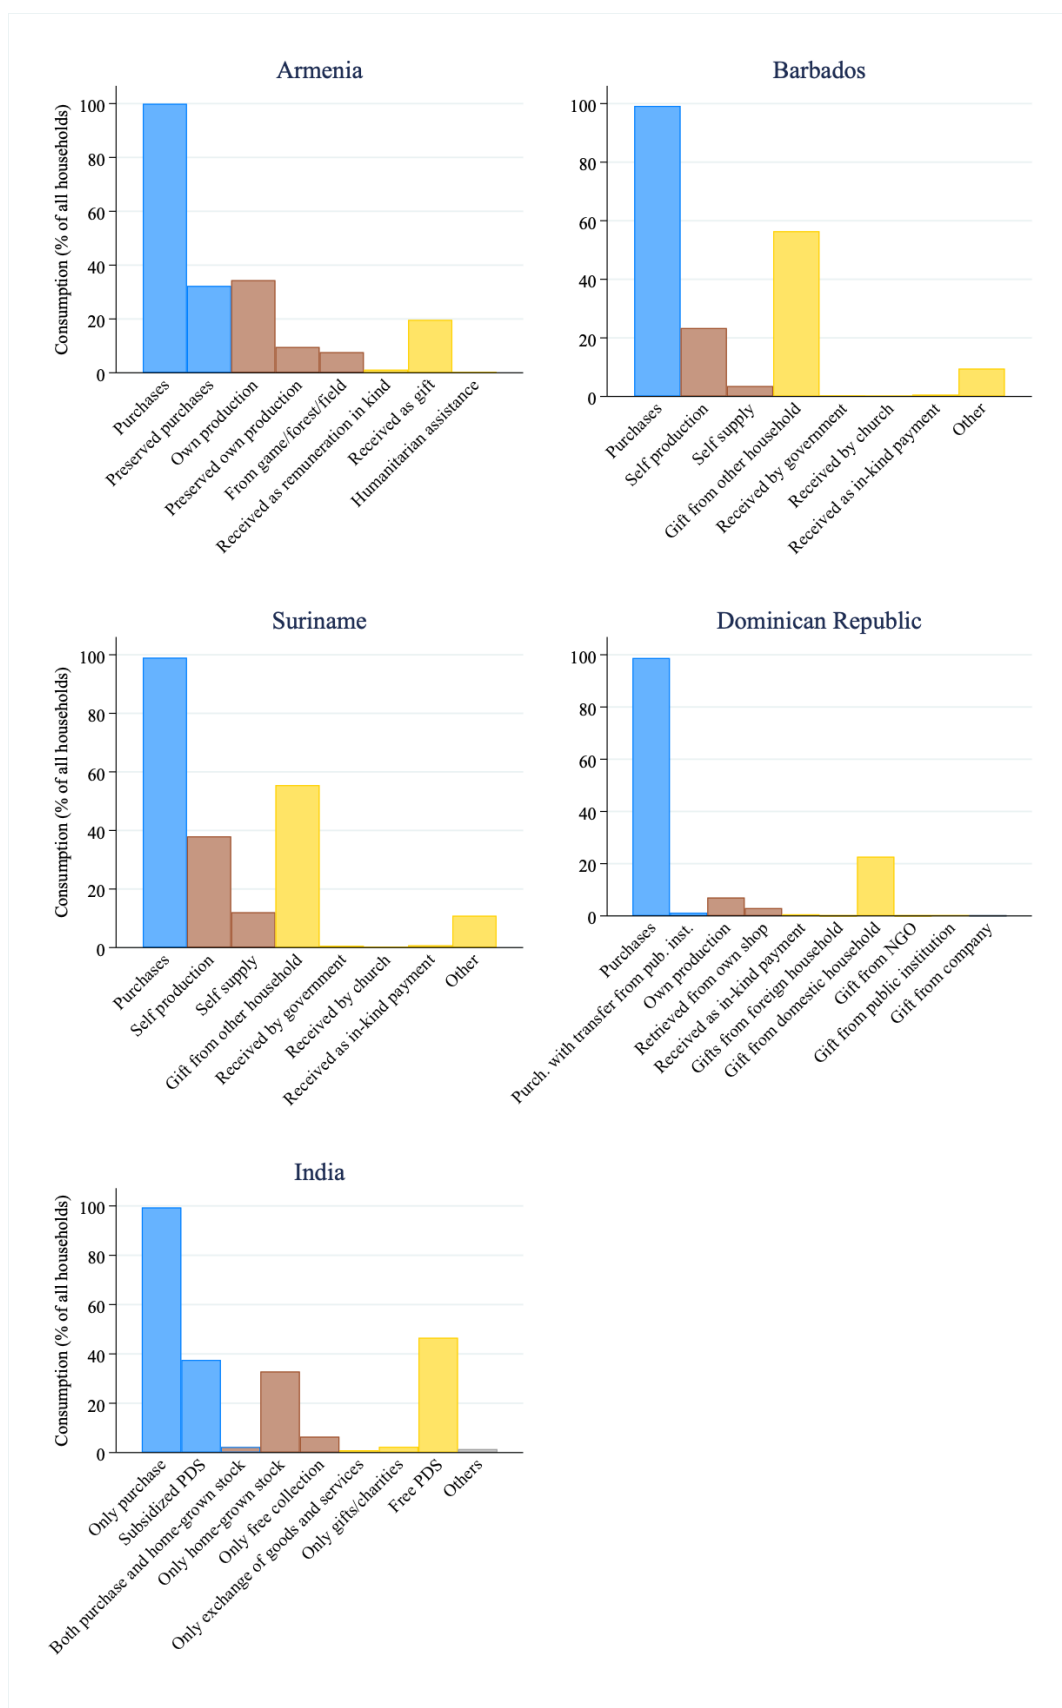

**Figure 4: Consumption from disaggregated food sources.** The y-axis shows the proportion of households that consume foods from each source. Blue are purchases, brown is own consumption, and yellow is food from gifts/in-kind.

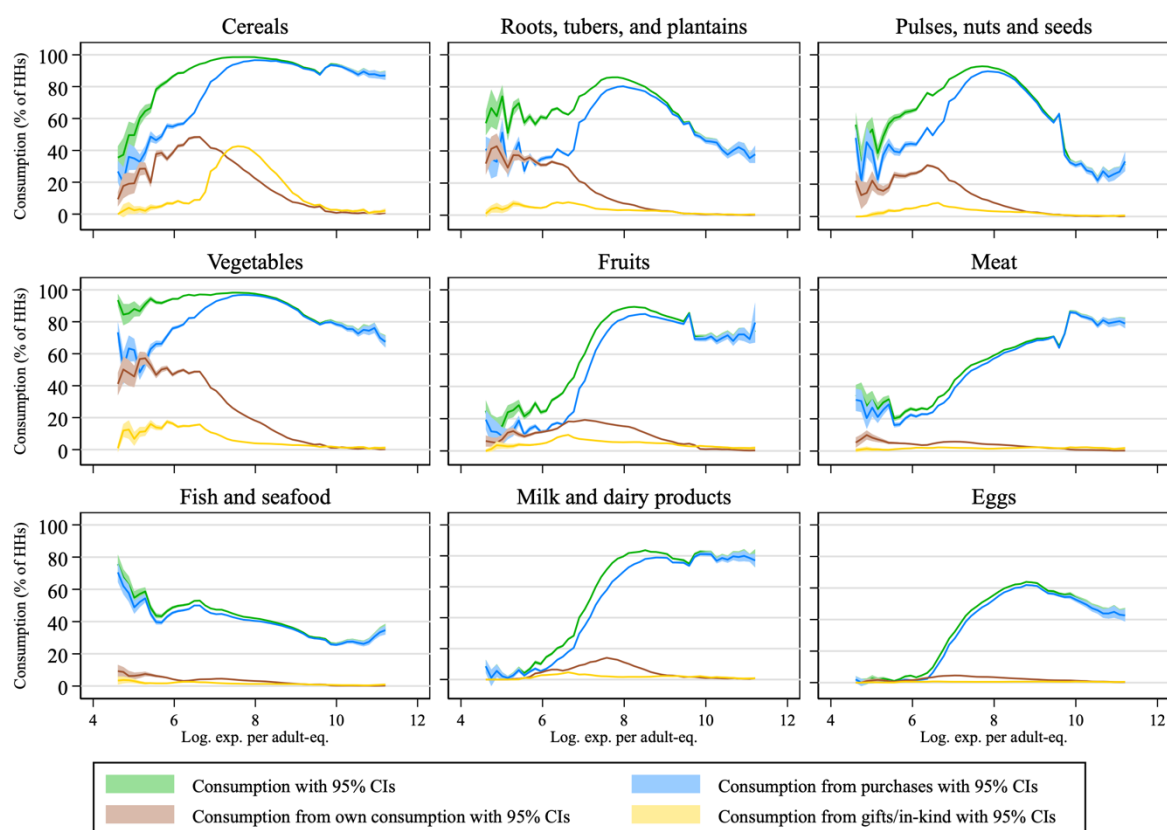

**Figure 5: Relationship between consumption of nine food groups from different sources and household income.** In this graph, we use local polynomial smooth plots with 95% confidence intervals to show the relationship between consumption of nine food groups from purchases, own production and gifts/in-kind and logarithmized household per adult-equivalent income.

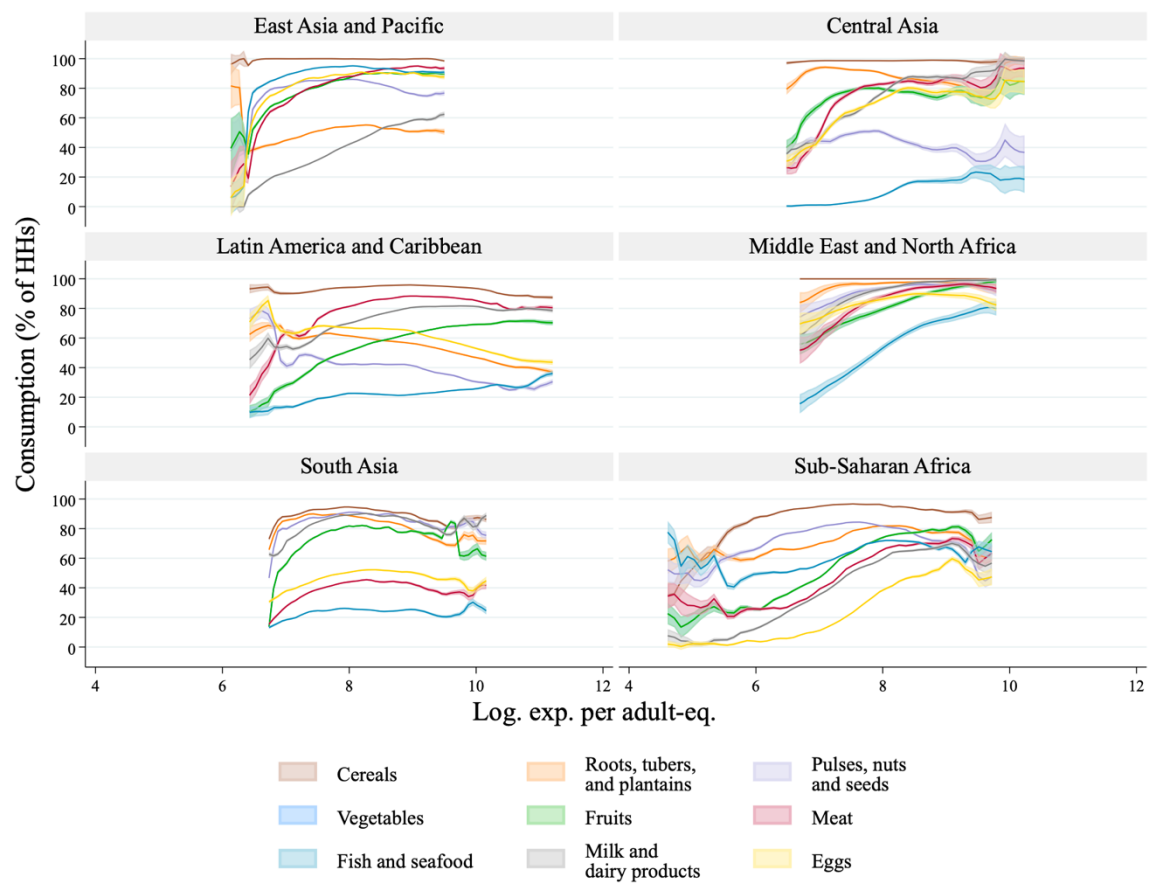

**Figure 6: Relationship between consumption of nine food groups and income by world region.** In this graph, we use local polynomial smooth plots with 95% confidence intervals to show the relationship between consumption of nine food groups and logarithmized household per adult-equivalent income.



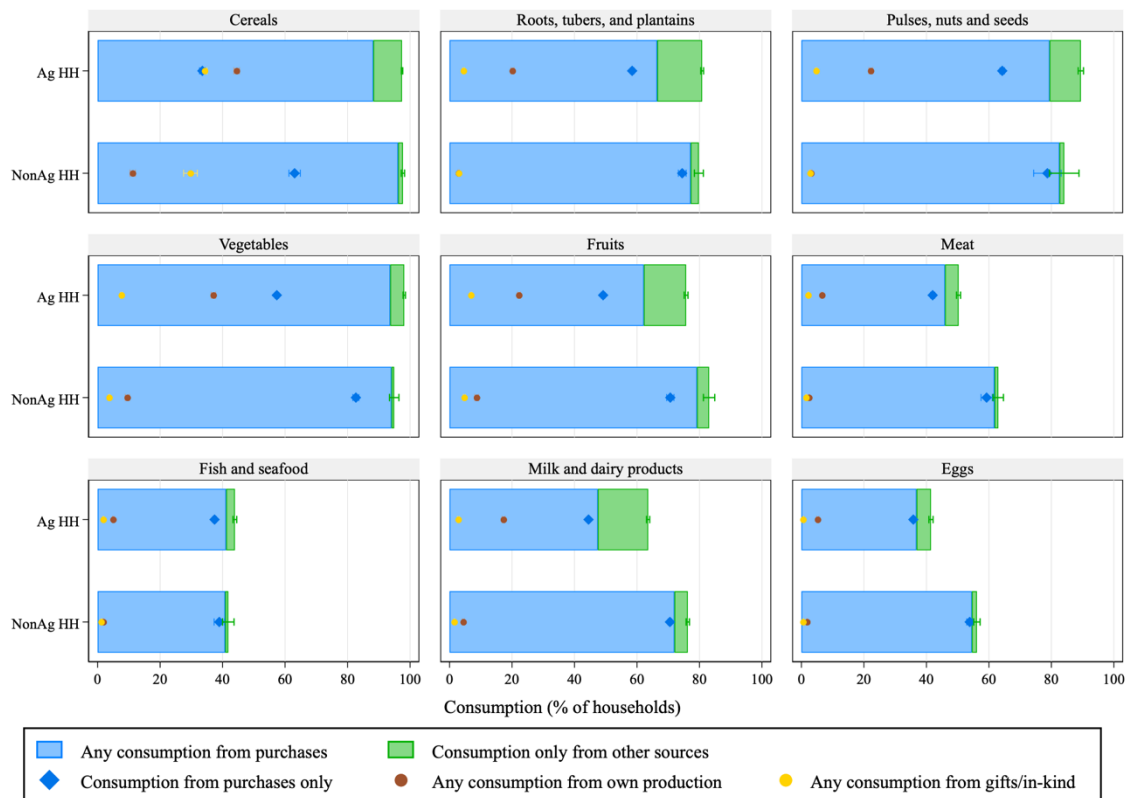

**Figure 7: Consumption and sourcing of 9 food groups by agriculture as primary activity of any household member.** The total bar length represents the average consumption of that food group within that category along with 95% confidence intervals. The length of the blue bar represents the proportion of households that consume this food group from purchases, independently of whether they also consumes them from other sources. The blue diamond depicts the share of households that consume a food group exclusively from purchases. The brown dots show the proportion from own production, while the yellow dots exhibit the share of households that consume a food group from gifts or in-kind.

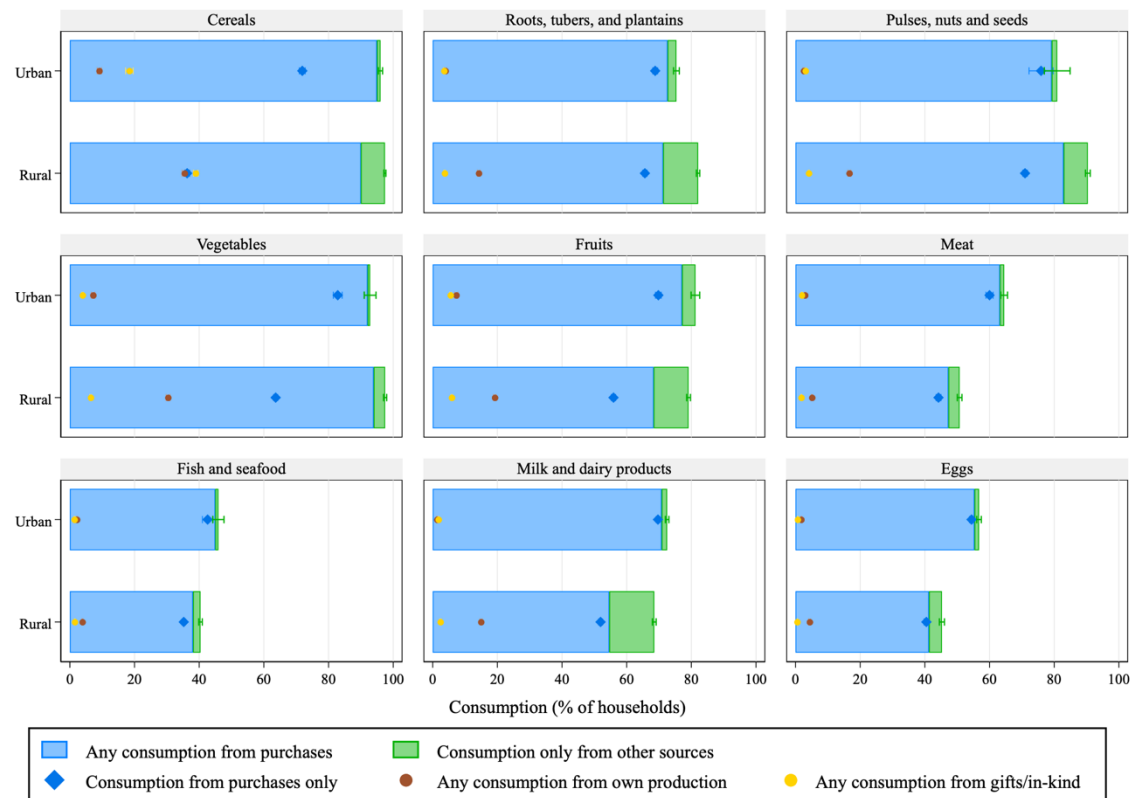

**Figure 8: Consumption and sourcing of 9 food groups by rural-urban location.** The total bar length represents the average consumption of that food group within that category along with 95% confidence intervals. The length of the blue bar represents the proportion of households that consume this food group exclusively from purchases. The blue diamond depicts the share of households that consume a food group from purchases, independently of whether it also consumes it from other sources. The brown dots show the proportion from own production, while the yellow dots exhibit the share of households that consume a food group from gifts or in-kind.

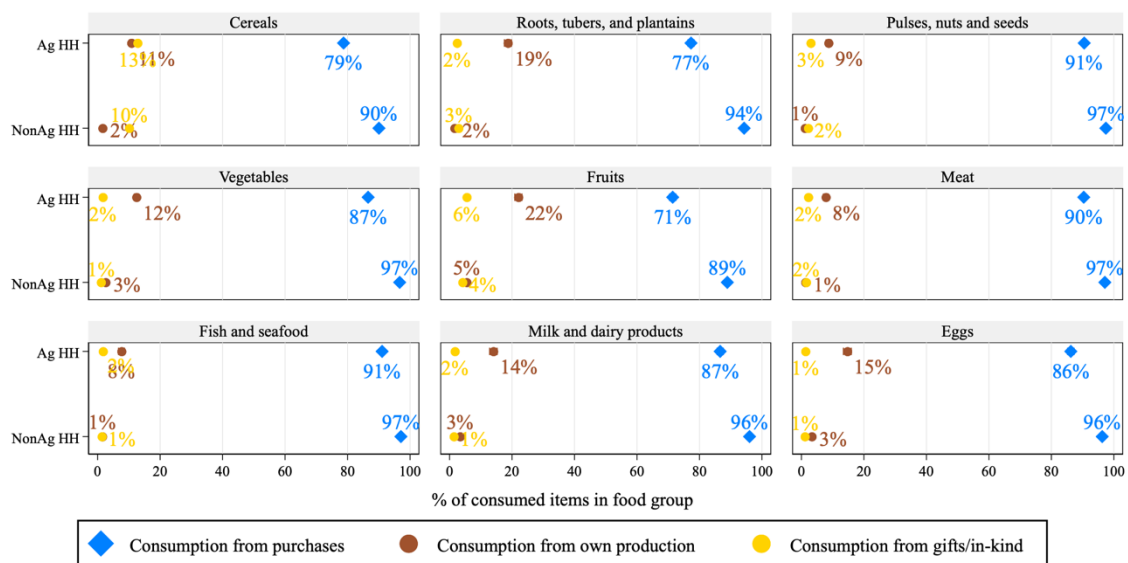

**Figure 9: Food item sources by food group and agriculture as primary activity of any household member.** The x-axis represents the proportion of all food items consumed and each source. Blue represents the proportion of food items sourced from purchases. Brown dots show the proportion from own production, while the yellow dots exhibit the share of food items from gifts or in-kind.

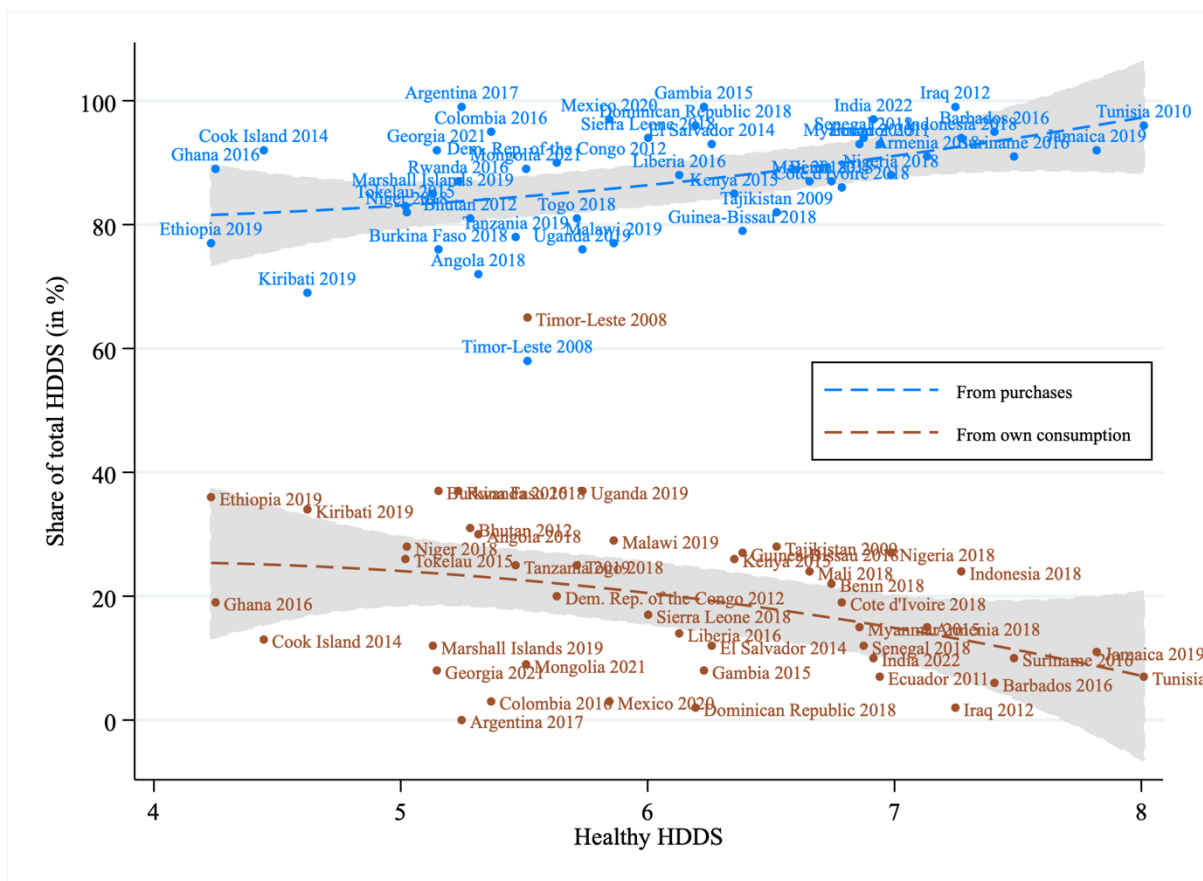

**Figure 10: Relationship between total household dietary diversity and proportion from purchases and own consumption.** Blue shows the relationship between total healthy HDDS (x-axis) and the proportion than is met through purchases (y-axis). Brown shows the relationship between total HDDS and the proportion covered through own consumption (y-axis). Grey areas represent 95% confidence intervals.

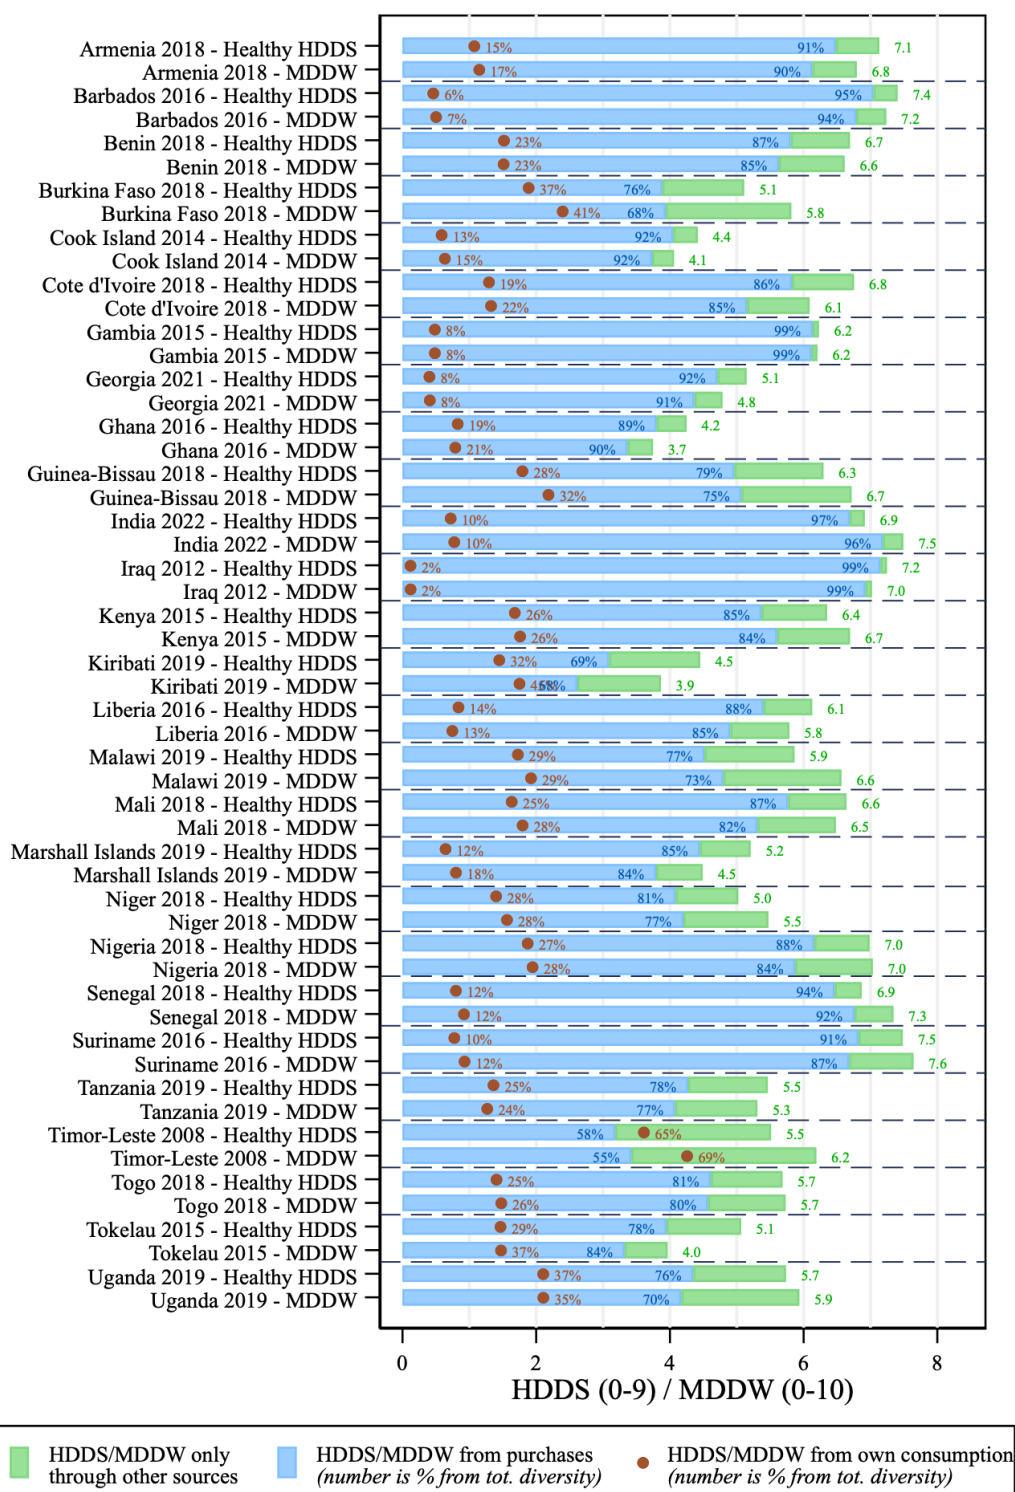

**Figure 11: Food sources using the HDDS versus the MDDW indicator by country.** We compare two indicators of dietary diversity: the healthy HDDS from Figure 3 and the Minimum Dietary Diversity for Women, both measured at the household level with a 7-day recall. The blue bars represent dietary diversity originating from purchases with numbers indicating their proportion from the total dietary diversity, while the green bar represents diversity augmented by alternative sources, including consumption from own production or contributions in the form of gifts or in-kind provisions. Thus, the green bar represents the proportion of dietary diversity that remains unmet by purchases, and not the total diversity provided by other sources. The dietary diversity attributed to these alternative sources could be greater than that of the green bars. Brown dots indicate their dietary diversity from own consumption, whereas numbers display their share from total dietary diversity.

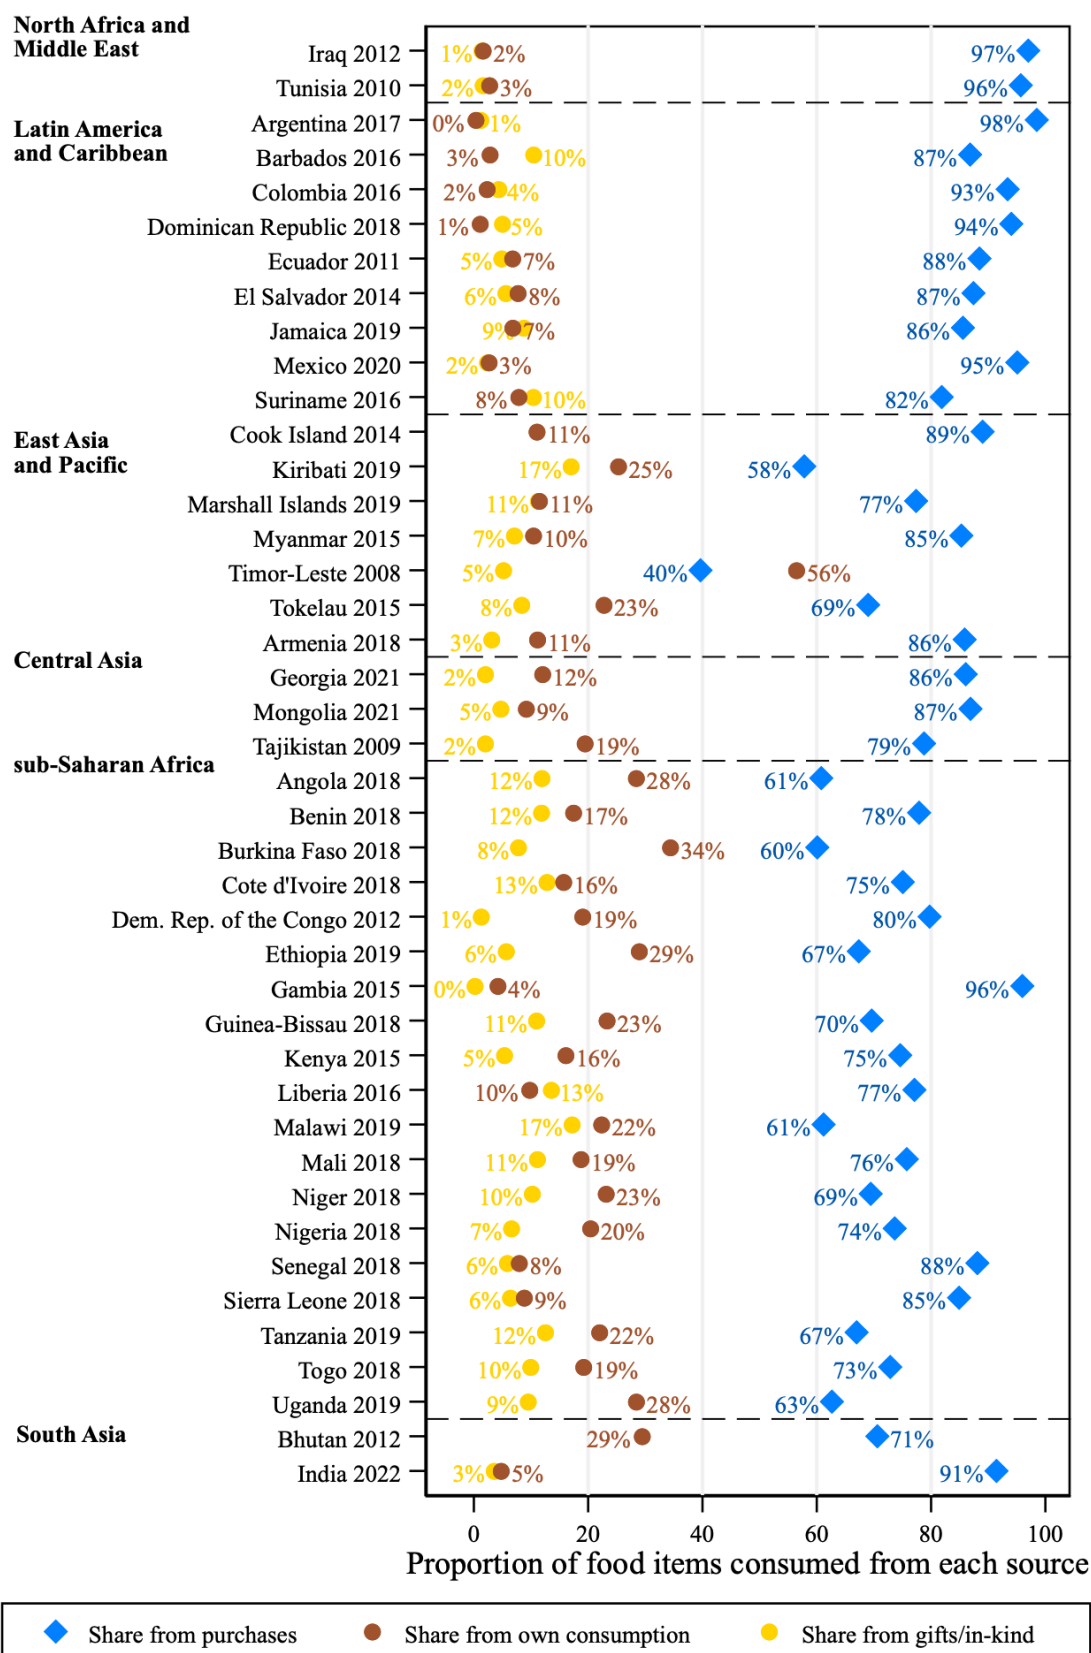

**Figure 12: Food item sources by country.** The x-axis represents the proportion of all food items consumed from each source. Blue represents the proportion of food items sourced from purchases. Brown dots show the proportion from own production, while the yellow dots exhibit the share of food items from gifts or in-kind.

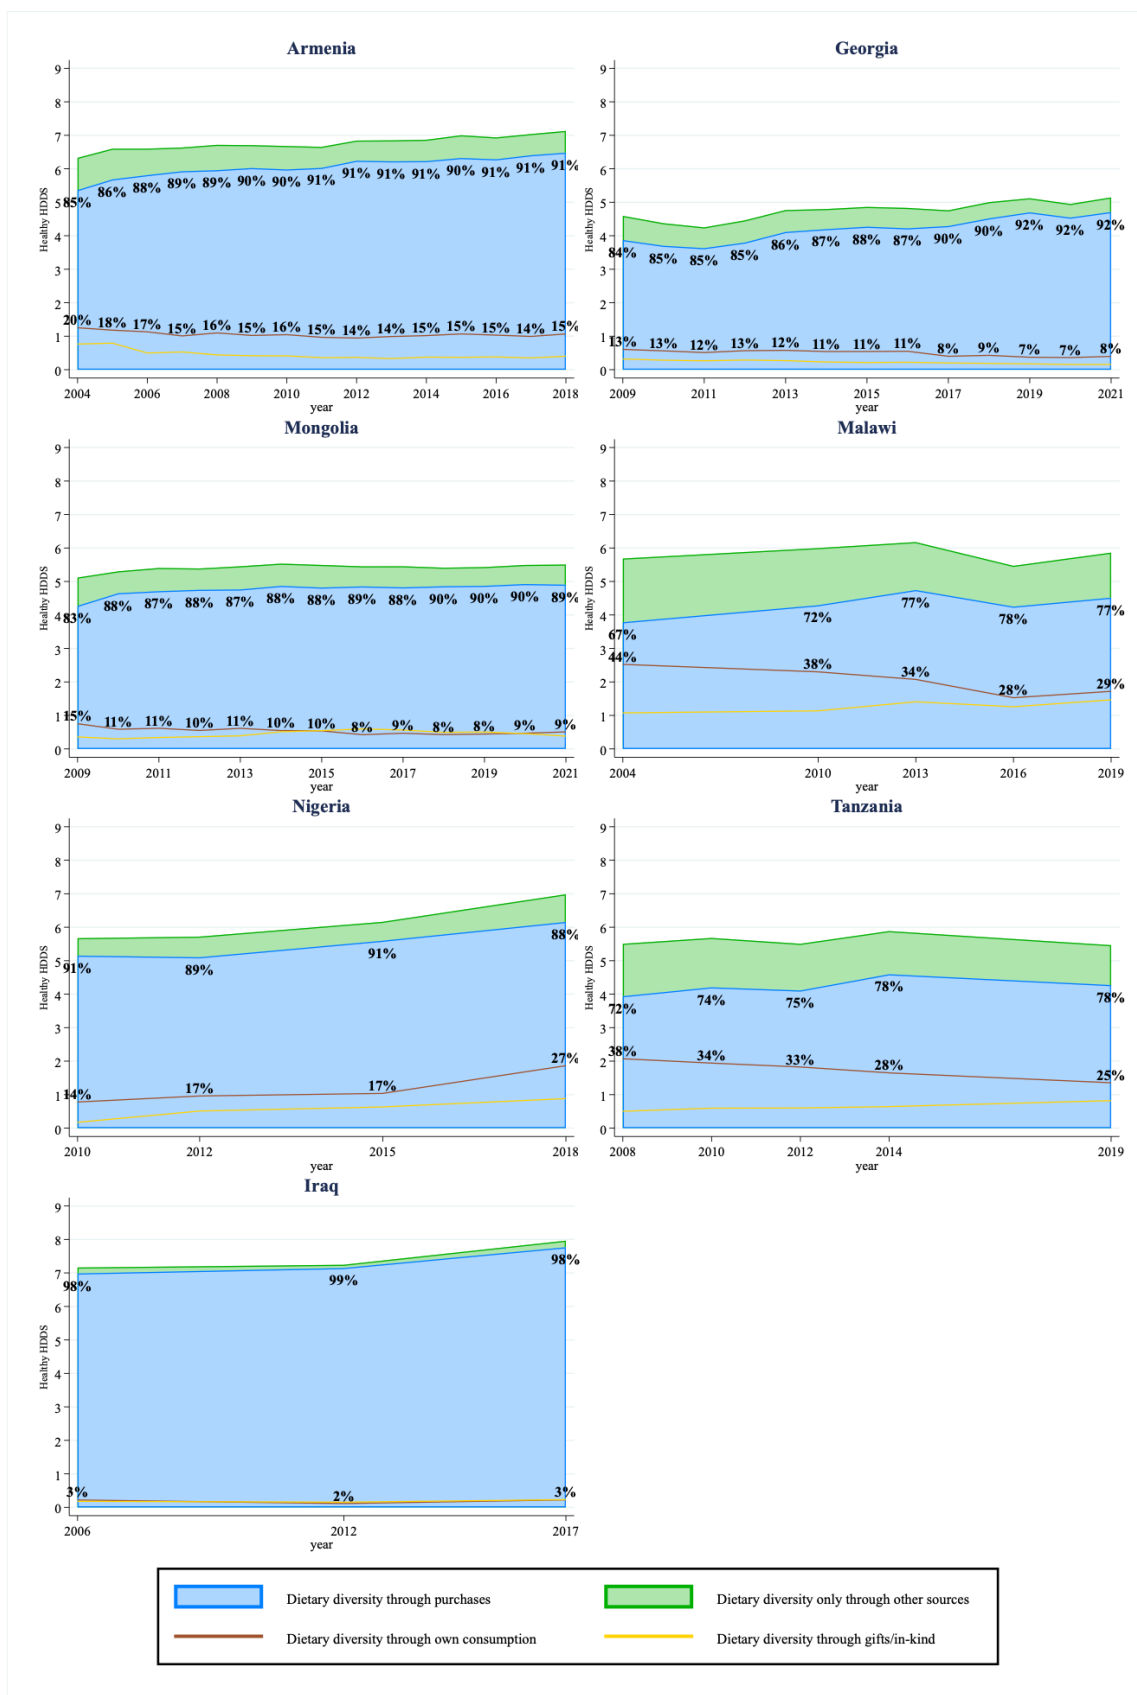

**Figure 13: Development of household dietary diversity and food sources over time.** The blue area depicts the dietary diversity from purchases with numbers indicating the proportion of the total HDDS that is met through purchases. The green area shows the absolute diversity that cannot be met through purchases. The brown line indicates the dietary diversity from own consumption with numbers indicating the proportion from the total HDDS. The yellow line indicates dietary diversity from gifts and in-kind.

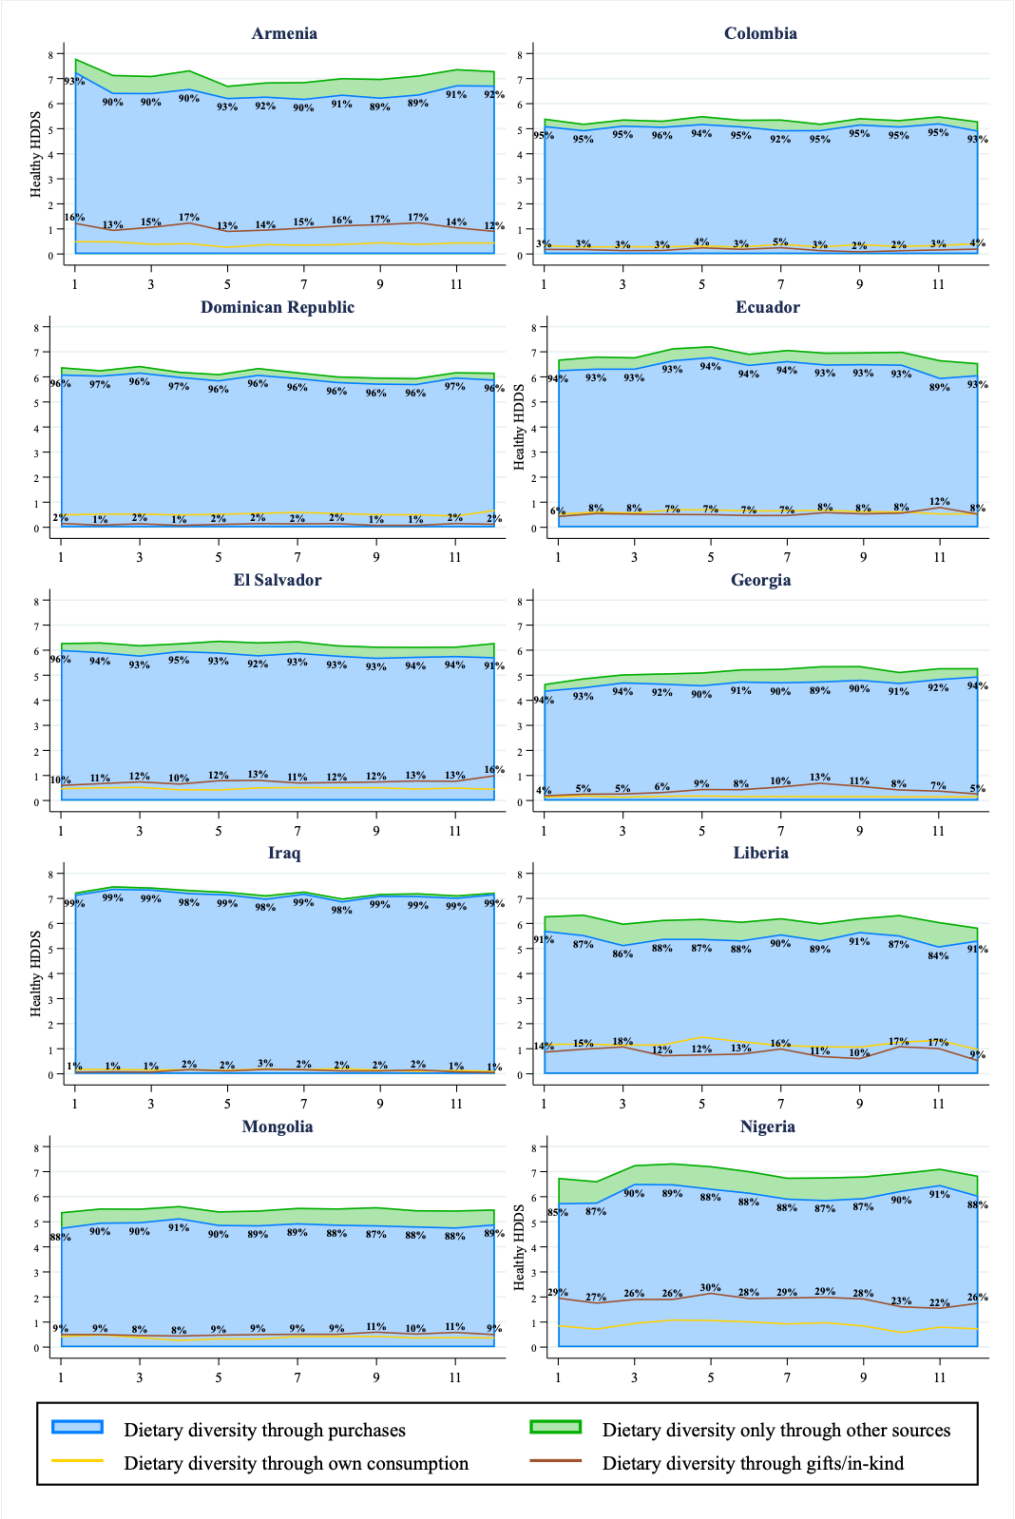

**Figure 14: Monthly household dietary diversity score (HDDS) and food sources in six countries.** The blue area depicts the dietary diversity from purchases with numbers indicating the proportion of the total HDDS that cannot be met through purchases. The green area shows the absolute diversity that can currently not be met through purchases. The yellow line indicates dietary diversity from own consumption with numbers indicating the proportion of current diversity that can be covered through own consumption. All surveys were conducted over a period of 12 months and had at least 100 observations in each month. We selected countries where the monthly rural-urban proportion did not vary by more than 10 percentage points around the annual mean to ensure equal spatial representation in each month.



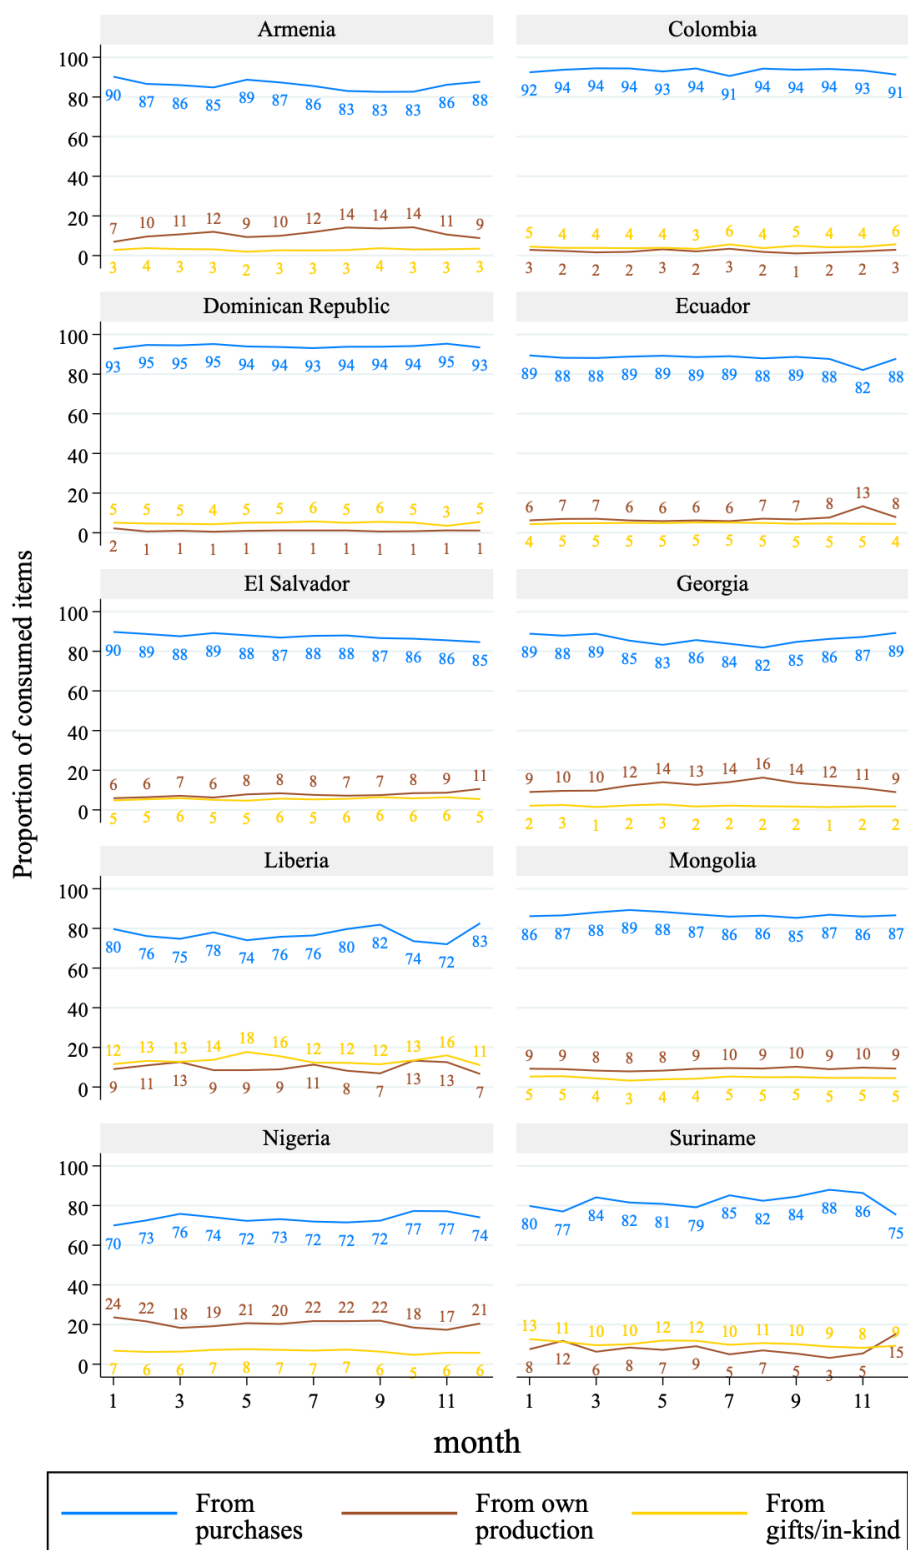

**Figure 15: Food item sources for ten countries by month.** The x-axis represents the month and the y-axis the proportion of all food items consumed from each source. Blue represents the proportion of food items sourced from purchases. Brown shows the proportion from own production, while yellow exhibits the share of food items from gifts or in-kind.

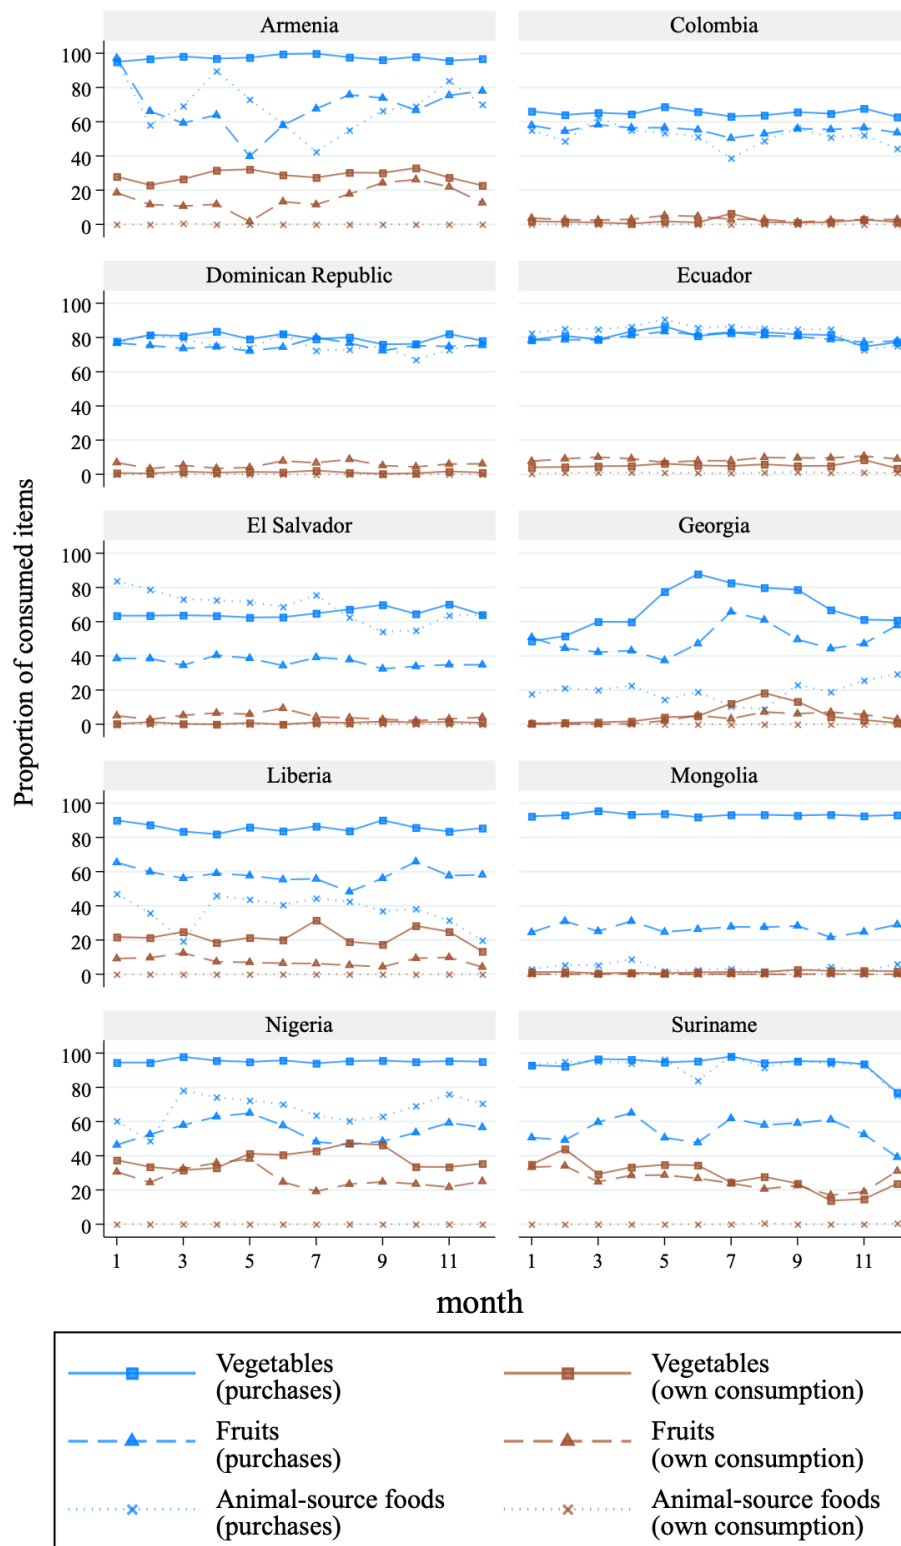

**Figure 16: Seasonality of food groups.** The x-axis represents the month and the y-axis the proportion of all food items consumed from purchases and own production. Squares represent vegetables, diamonds are representative for fruits and x shows animal-source foods (meat, fish and seafood, milk and dairy products, eggs).

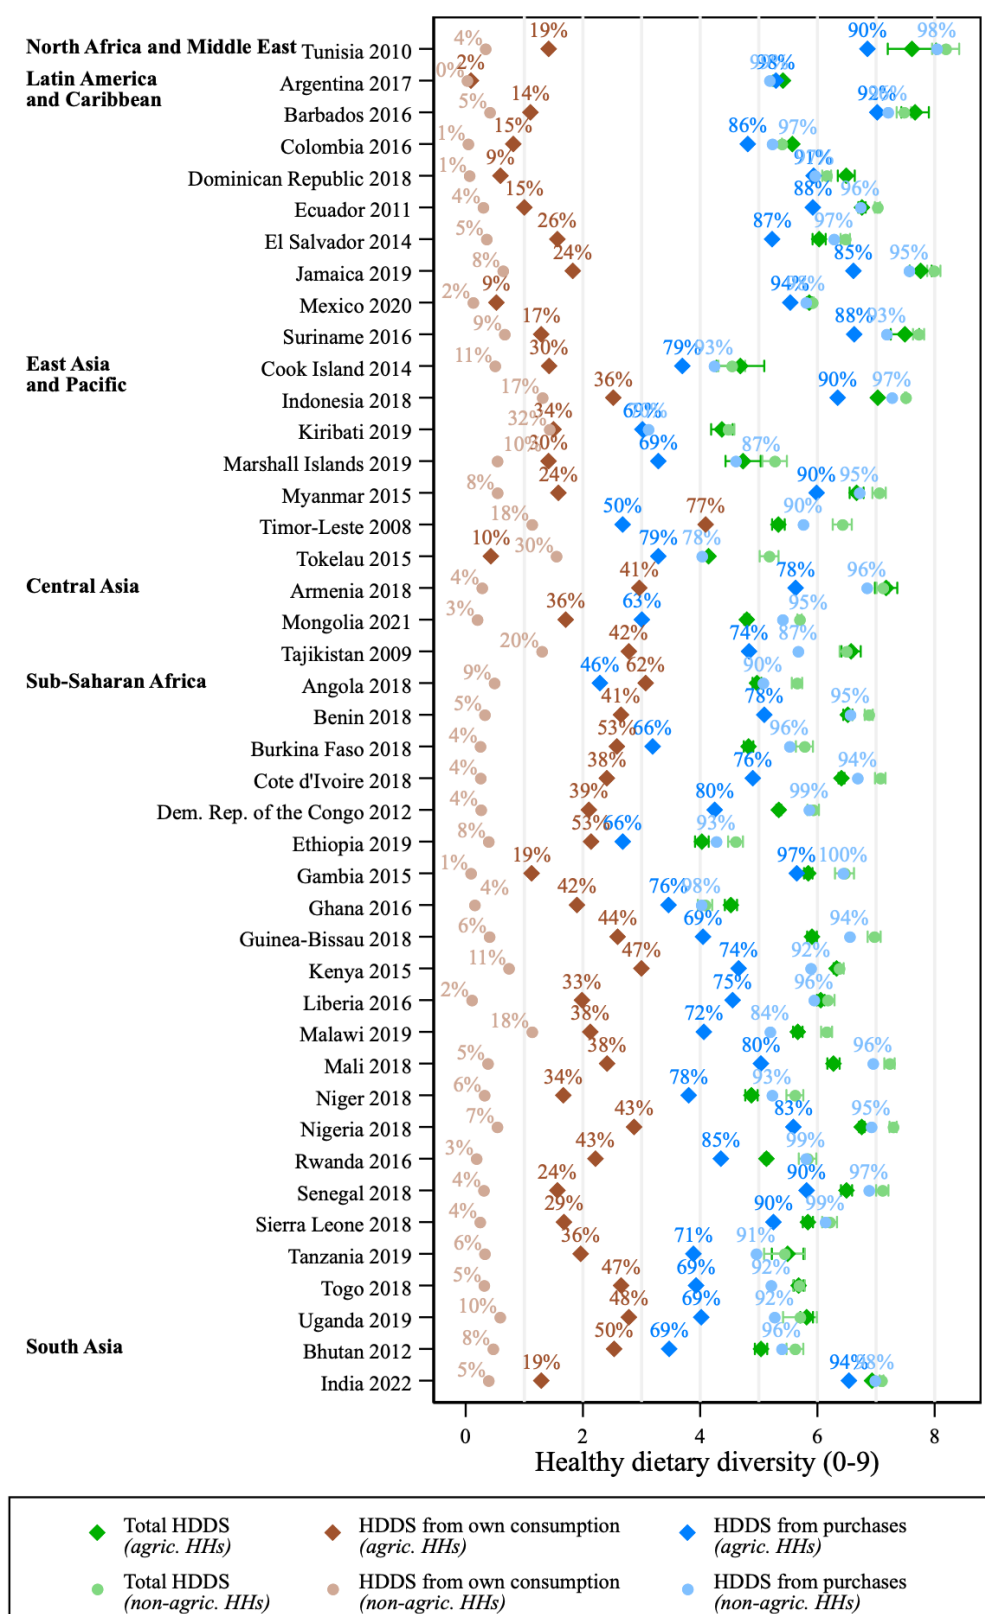

**Figure 17. Dietary diversity by country, food source, and engagement in agricultural activities.** Green depicts the healthy HDDS with 95% confidence intervals, blue the HDDS of foods consumed from purchases, brown the HDDS from own consumption. Thereby, dark colors and diamonds represent households in which head or spouse is employed in agriculture and shallow dots represent non-agricultural households.

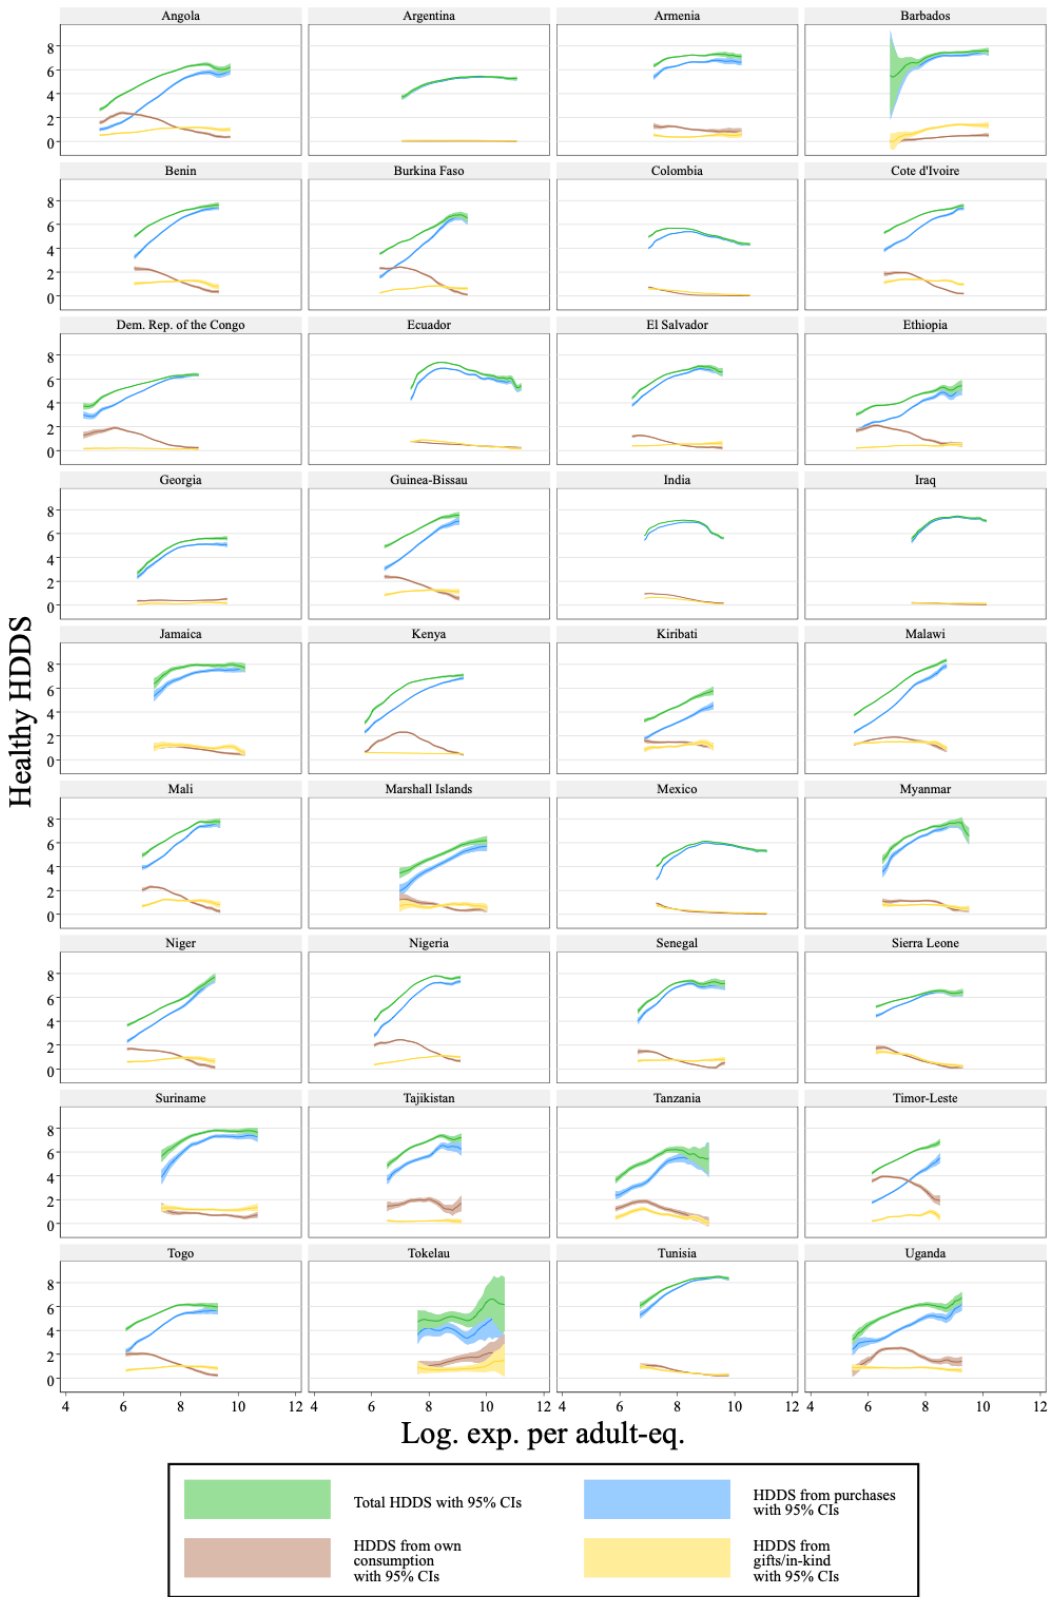

**Figure 18: Relationship between dietary diversity from different sources and income by country.** In this graph, we use local polynomial smooth plots with 95% confidence intervals to show the relationship between healthy household dietary diversity from purchases, own production and gifts/in-kind and logarithmized household per adult-equivalent income.

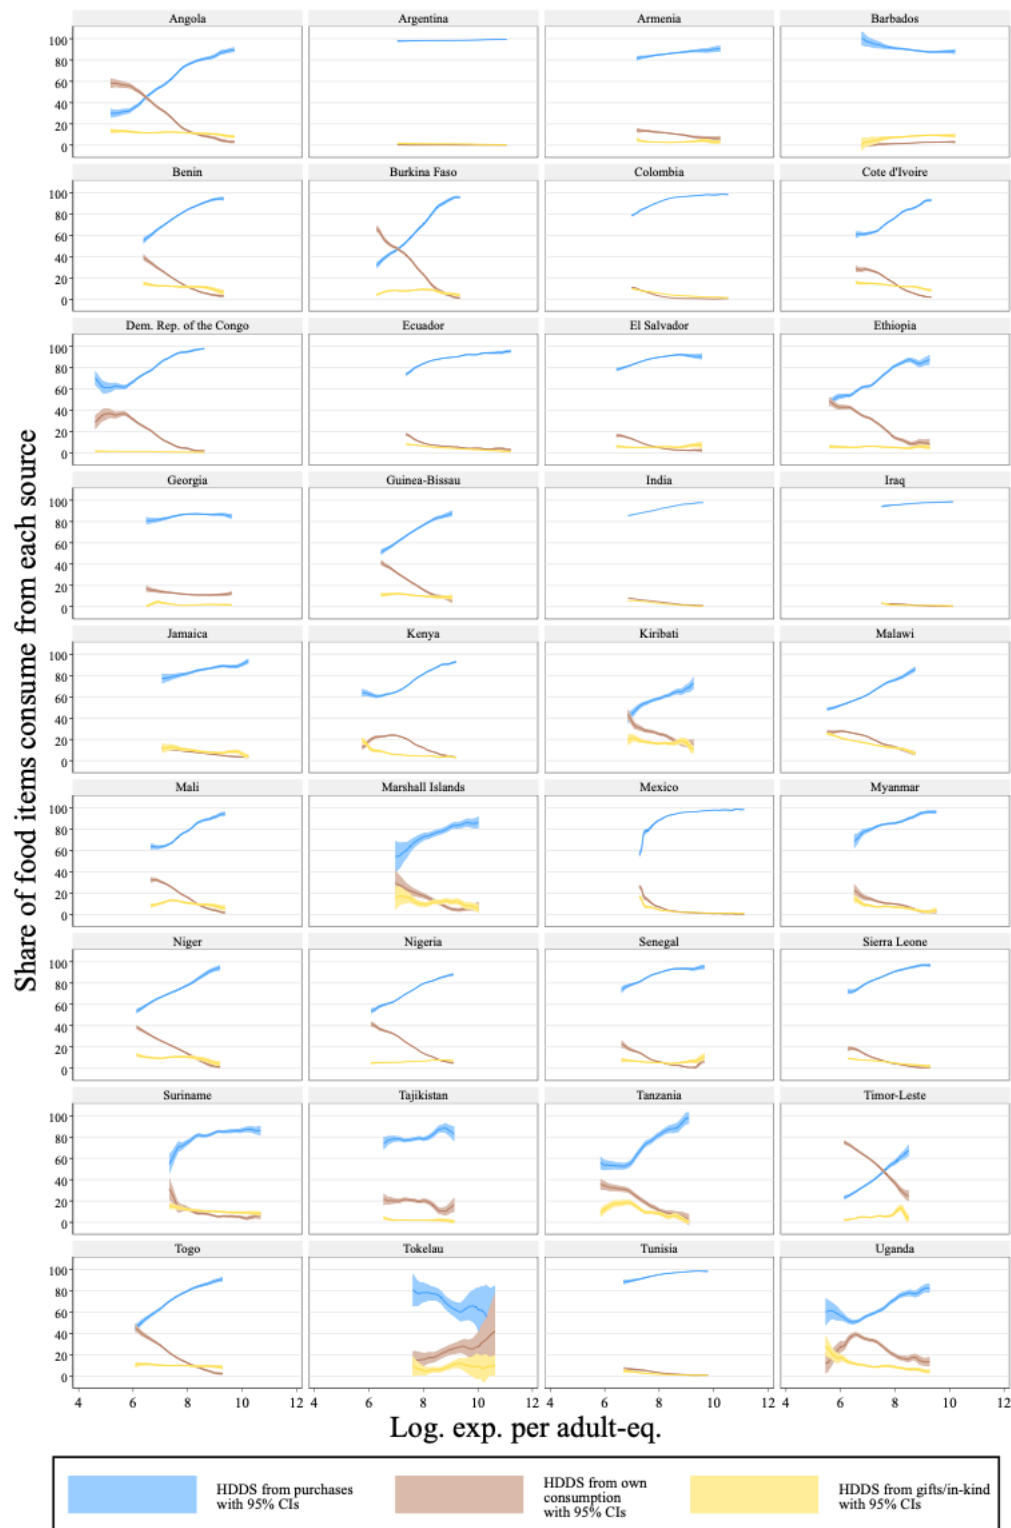

**Figure 19: Relationship between food item diversity from different sources and income by country.** In this graph, we use local polynomial smooth plots with 95% confidence intervals to show the relationship between the proportion of food items sourced from purchases, own production and gifts/in-kind and logarithmized household per adult-equivalent income.

## Supplementary Tables

**Table 1: Household dietary diversity and food sources at country-level by rural-urban location and expenditure terciles.**

| Country & Year        | Rural           |             |          |             |                 |             |          |             | Urban           |             |          |             |                 |             |          |             |
|-----------------------|-----------------|-------------|----------|-------------|-----------------|-------------|----------|-------------|-----------------|-------------|----------|-------------|-----------------|-------------|----------|-------------|
|                       | Poorest tercile |             |          |             | Richest tercile |             |          |             | Poorest tercile |             |          |             | Richest tercile |             |          |             |
|                       | HDDS purch      | % from tot. | HDDS own | % from tot. | HDDS purch      | % from tot. | HDDS own | % from tot. | HDDS purch      | % from tot. | HDDS own | % from tot. | HDDS purch      | % from tot. | HDDS own | % from tot. |
|                       | (1)             | (2)         | (3)      | (4)         | (5)             | (6)         | (7)      | (8)         | (9)             | (10)        | (11)     | (12)        | (13)            | (14)        | (15)     | (16)        |
| Angola 2018           | 1.4             | 33          | 3.0      | 71          | 3.4             | 59          | 2.5      | 43          | 3.8             | 82          | 0.9      | 20          | 5.9             | 93          | 0.5      | 7           |
| Armenia 2018          | 5.3             | 76          | 2.8      | 41          | 6.1             | 83          | 2.6      | 36          | 6.7             | 96          | 0.2      | 3           | 7.0             | 97          | 0.1      | 1           |
| Benin 2018            | 4.3             | 72          | 2.5      | 41          | 6.6             | 92          | 1.4      | 20          | 5.1             | 84          | 1.5      | 25          | 7.0             | 96          | 0.4      | 6           |
| Bhutan 2012           | 2.9             | 62          | 2.6      | 56          | 4.6             | 83          | 1.8      | 33          | 4.8             | 97          | 0.3      | 7           | 6.0             | 99          | 0.2      | 3           |
| Burkina Faso 2018     | 2.5             | 57          | 2.5      | 58          | 4.5             | 79          | 2.4      | 42          | 3.8             | 84          | 1.1      | 25          | 6.1             | 97          | 0.2      | 3           |
| Colombia 2016         | 4.5             | 83          | 0.8      | 15          | 4.7             | 90          | 0.5      | 9           | 5.5             | 96          | 0.0      | 0           | 4.8             | 98          | 0.0      | 0           |
| Cook Island 2014      | 3.4             | 79          | 1.3      | 30          | 4.0             | 87          | 1.1      | 23          | 4.0             | 95          | 0.2      | 6           | 4.1             | 97          | 0.3      | 6           |
| Cote d'Ivoire 2018    | 4.4             | 73          | 2.4      | 40          | 5.6             | 82          | 1.7      | 25          | 5.3             | 86          | 1.1      | 17          | 7.1             | 96          | 0.2      | 3           |
| DRC 2012              | 3.5             | 71          | 2.4      | 49          | 4.7             | 83          | 2.3      | 40          | 5.0             | 98          | 0.4      | 8           | 6.2             | 99          | 0.2      | 3           |
| Ecuador 2011          | 5.5             | 85          | 1.0      | 16          | 5.8             | 88          | 1.0      | 16          | 7.4             | 96          | 0.3      | 3           | 6.2             | 96          | 0.3      | 4           |
| El Salvador 2014      | 4.9             | 87          | 1.4      | 25          | 6.0             | 91          | 1.0      | 15          | 5.5             | 95          | 0.4      | 7           | 6.8             | 99          | 0.1      | 2           |
| Ethiopia 2019         | 2.3             | 63          | 2.1      | 56          | 3.1             | 72          | 2.0      | 46          | 3.7             | 93          | 0.4      | 11          | 5.0             | 97          | 0.2      | 4           |
| Georgia 2021          | 3.0             | 80          | 0.8      | 21          | 4.0             | 79          | 1.1      | 21          | 4.8             | 97          | 0.1      | 1           | 5.7             | 97          | 0.1      | 1           |
| Ghana 2016            | 3.0             | 72          | 1.9      | 45          | 3.6             | 88          | 0.9      | 23          | 3.8             | 92          | 0.8      | 19          | 4.0             | 98          | 0.2      | 4           |
| Guinea-Bissau 2018    | 3.2             | 60          | 2.8      | 53          | 4.4             | 69          | 2.8      | 44          | 5.3             | 89          | 0.9      | 14          | 6.9             | 94          | 0.5      | 6           |
| India 2022            | 6.5             | 95          | 1.0      | 15          | 6.7             | 97          | 0.9      | 13          | 6.8             | 99          | 0.2      | 3           | 6.7             | 100         | 0.1      | 2           |
| Indonesia 2018        | 5.9             | 88          | 2.5      | 37          | 6.9             | 94          | 2.1      | 29          | 6.8             | 94          | 1.7      | 23          | 7.3             | 98          | 1.0      | 13          |
| Iraq 2012             | 6.3             | 96          | 0.4      | 5           | 7.0             | 97          | 0.4      | 5           | 7.1             | 99          | 0.0      | 0           | 7.4             | 99          | 0.0      | 0           |
| Kenya 2015            | 3.9             | 74          | 2.1      | 39          | 5.5             | 80          | 2.7      | 39          | 4.8             | 87          | 1.2      | 21          | 6.6             | 97          | 0.4      | 6           |
| Kiribati 2019         | 1.8             | 49          | 1.8      | 49          | 2.7             | 60          | 1.8      | 40          | 3.2             | 79          | 0.9      | 23          | 4.7             | 86          | 1.0      | 18          |
| Malawi 2019           | 3.1             | 67          | 1.7      | 36          | 5.5             | 80          | 2.2      | 32          | 4.9             | 92          | 0.5      | 9           | 7.4             | 96          | 0.5      | 7           |
| Mali 2018             | 4.5             | 77          | 2.4      | 41          | 6.5             | 89          | 1.5      | 21          | 5.7             | 92          | 0.9      | 15          | 7.6             | 98          | 0.3      | 3           |
| Marshall Islands 2019 | 2.1             | 52          | 1.9      | 46          | 2.6             | 55          | 1.5      | 31          | 3.8             | 91          | 0.3      | 7           | 5.5             | 94          | 0.2      | 4           |
| Mexico 2020           | 5.1             | 93          | 0.6      | 10          | 5.7             | 96          | 0.3      | 5           | 5.5             | 96          | 0.2      | 3           | 5.7             | 99          | 0.1      | 1           |
| Myanmar 2015          | 5.4             | 87          | 1.2      | 20          | 6.8             | 93          | 1.5      | 21          | 7.0             | 98          | 0.2      | 3           | 7.4             | 99          | 0.2      | 3           |
| Niger 2018            | 3.1             | 72          | 1.6      | 39          | 4.7             | 84          | 1.4      | 26          | 4.2             | 92          | 0.5      | 12          | 6.3             | 97          | 0.2      | 3           |
| Nigeria 2018          | 4.5             | 78          | 2.6      | 45          | 6.6             | 87          | 2.4      | 32          | 5.6             | 91          | 1.1      | 18          | 7.5             | 96          | 0.6      | 8           |
| Rwanda 2016           | 3.8             | 84          | 1.8      | 40          | 4.9             | 86          | 2.5      | 44          | 4.9             | 96          | 0.7      | 14          | 6.0             | 98          | 0.5      | 8           |
| Senegal 2018          | 5.1             | 88          | 1.6      | 27          | 6.5             | 92          | 1.1      | 15          | 6.2             | 95          | 0.5      | 8           | 7.2             | 98          | 0.2      | 2           |
| Sierra Leone 2018     | 4.9             | 88          | 1.8      | 33          | 5.7             | 92          | 1.6      | 25          | 5.7             | 98          | 0.6      | 10          | 6.4             | 99          | 0.1      | 2           |
| Tajikistan 2009       | 4.4             | 76          | 2.1      | 36          | 5.4             | 77          | 2.6      | 37          | 5.6             | 95          | 0.6      | 11          | 6.9             | 95          | 0.6      | 8           |
| Tanzania 2019         | 3.0             | 63          | 1.7      | 37          | 5.3             | 85          | 1.6      | 26          | 3.8             | 75          | 1.2      | 24          | 5.5             | 95          | 0.3      | 5           |
| Timor-Leste 2008      | 2.1             | 44          | 4.0      | 83          | 3.1             | 53          | 4.1      | 71          | 3.4             | 65          | 3.2      | 60          | 6.3             | 90          | 1.4      | 20          |
| Togo 2018             | 3.3             | 64          | 2.4      | 47          | 5.0             | 79          | 2.0      | 32          | 4.4             | 89          | 0.5      | 11          | 5.6             | 94          | 0.2      | 4           |
| Tunisia 2010          | 6.1             | 87          | 1.3      | 19          | 7.6             | 93          | 1.3      | 16          | 7.6             | 98          | 0.3      | 3           | 8.5             | 99          | 0.2      | 2           |
| Uganda 2019           | 3.4             | 66          | 2.4      | 46          | 4.5             | 74          | 2.6      | 43          | 4.3             | 83          | 1.3      | 25          | 5.6             | 91          | 0.8      | 14          |

Notes: Columns display means for population groups in absolute food groups and percent of total HDDS from own consumption (brown) and purchases (blue). Population groups are rural households from the poorest and richest income terciles of a country and their urban counterparts.

176

**Table 2: Differences in household dietary diversity and food sources by rural-urban location and expenditure terciles at country-level.**

| Country & Year of survey start | Combined (RT1-UT3) |     |           |      |     | Physical constraints |     |           |      |     |                     |     |           |      |     | Economic constraints |      |           |      |     |                 |      |           |      |     |
|--------------------------------|--------------------|-----|-----------|------|-----|----------------------|-----|-----------|------|-----|---------------------|-----|-----------|------|-----|----------------------|------|-----------|------|-----|-----------------|------|-----------|------|-----|
|                                |                    |     |           |      |     | Tercile 1 (RT1-UT1)  |     |           |      |     | Tercile 3 (RT3-UT3) |     |           |      |     | Rural (RT1-RT3)      |      |           |      |     | Urban (UT1-UT3) |      |           |      |     |
|                                | Own consumption    |     | Purchases |      |     | Own consumption      |     | Purchases |      |     | Own consumption     |     | Purchases |      |     | Own consumption      |      | Purchases |      |     | Own consumption |      | Purchases |      |     |
|                                | ΔHDDS              | Δ%  | ΔHDDS     | Δ%   | Δ%  | ΔHDDS                | Δ%  | ΔHDDS     | Δ%   | Δ%  | ΔHDDS               | Δ%  | ΔHDDS     | Δ%   | Δ%  | ΔHDDS                | Δ%   | ΔHDDS     | Δ%   | Δ%  | ΔHDDS           | Δ%   | ΔHDDS     | Δ%   | Δ%  |
| Angola 2018                    | -2.1               | 2.6 | 64        | -4.5 | -61 | -0.4                 | 2.1 | 51        | -2.4 | -49 | -0.5                | 2.0 | 35        | -2.5 | -35 | -1.6                 | 0.5  | 28        | -2.0 | -26 | -1.7            | 0.5  | 13        | -2.1 | -11 |
| Amenia 2018                    | -0.3               | 2.8 | 40        | -1.7 | -21 | 0.0                  | 2.6 | 38        | -1.4 | -20 | 0.1                 | 2.5 | 35        | -1.0 | -15 | -0.4                 | 0.2  | 5         | -0.7 | -6  | -0.2            | 0.1  | 2         | -0.3 | -1  |
| Benin 2018                     | -1.3               | 2.0 | 35        | -2.7 | -24 | -0.1                 | 0.9 | 16        | -0.8 | -12 | -0.1                | 1.0 | 14        | -0.4 | -5  | -1.2                 | 1.0  | 22        | -2.3 | -19 | -1.2            | 1.1  | 19        | -1.9 | -12 |
| Bhutan 2012                    | -1.4               | 2.4 | 53        | -3.1 | -37 | -0.3                 | 2.3 | 49        | -1.9 | -35 | -0.5                | 1.6 | 30        | -1.4 | -16 | -0.9                 | 0.8  | 23        | -1.7 | -21 | -1.1            | 0.1  | 4         | -1.2 | -2  |
| Burkina Faso 2018              | -2.0               | 2.3 | 56        | -3.6 | -40 | -0.2                 | 1.4 | 34        | -1.4 | -27 | -0.5                | 2.3 | 40        | -1.6 | -19 | -1.4                 | 0.1  | 16        | -2.1 | -22 | -1.7            | 1.0  | 22        | -2.3 | -13 |
| Colombia 2016                  | 0.5                | 0.8 | 15        | -0.3 | -15 | -0.3                 | 0.8 | 15        | -1.0 | -13 | 0.3                 | 0.5 | 9         | -0.1 | -8  | 0.2                  | 0.3  | 6         | -0.2 | -7  | 0.8             | 0.0  | 0         | 0.7  | -2  |
| Cook Island 2014               | 0.1                | 1.0 | 24        | -0.7 | -18 | 0.1                  | 1.1 | 25        | -0.6 | -16 | 0.4                 | 0.8 | 17        | -0.1 | -10 | -0.3                 | 0.2  | 7         | -0.6 | -8  | 0.0             | 0.0  | -1        | -0.1 | -2  |
| Cote d'Ivoire 2018             | -1.3               | 2.2 | 37        | -2.7 | -23 | -0.2                 | 1.3 | 23        | -0.9 | -13 | -0.6                | 1.5 | 23        | -1.5 | -14 | -0.7                 | 0.7  | 14        | -1.2 | -9  | -1.2            | 0.9  | 14        | -1.8 | -11 |
| DRC 2012                       | -1.3               | 2.2 | 46        | -2.7 | -28 | -0.2                 | 2.0 | 42        | -1.5 | -27 | -0.5                | 2.1 | 37        | -1.5 | -17 | -0.7                 | 0.2  | 9         | -1.2 | -12 | -1.1            | 0.2  | 5         | -1.2 | -2  |
| Ecuador 2011                   | 0.0                | 0.7 | 12        | -0.7 | -11 | -1.2                 | 0.7 | 12        | -1.9 | -11 | 0.1                 | 0.8 | 12        | -0.5 | -8  | 0.0                  | 0.0  | 0         | -0.2 | -3  | 1.3             | 0.0  | -1        | 1.2  | 0   |
| El Salvador 2014               | -1.3               | 1.2 | 23        | -1.9 | -11 | -0.2                 | 1.0 | 18        | -0.7 | -8  | -0.2                | 0.9 | 13        | -0.8 | -8  | -1.1                 | 0.4  | 10        | -1.2 | -3  | -1.1            | 0.3  | 5         | -1.3 | -3  |
| Ethiopia 2019                  | -1.5               | 1.9 | 52        | -2.7 | -34 | -0.3                 | 1.6 | 45        | -1.3 | -30 | -0.9                | 1.8 | 42        | -1.9 | -25 | -0.6                 | 0.1  | 10        | -0.8 | -9  | -1.2            | 0.2  | 7         | -1.4 | -4  |
| Georgia 2021                   | -2.1               | 0.7 | 20        | -2.7 | -17 | -1.1                 | 0.7 | 20        | -1.7 | -17 | -0.9                | 1.0 | 20        | -1.7 | -18 | -1.2                 | -0.2 | 0         | -0.9 | 0   | -1.0            | 0.0  | 0         | -1.0 | 0   |
| Ghana 2016                     | 0.1                | 1.7 | 41        | -1.0 | -27 | 0.1                  | 1.1 | 27        | -0.8 | -20 | 0.0                 | 0.8 | 19        | -0.4 | -10 | 0.0                  | 1.0  | 22        | -0.6 | -16 | 0.0             | 0.6  | 15        | -0.3 | -6  |
| Guinea-Bissau 2018             | -2.0               | 2.4 | 47        | -3.7 | -34 | -0.7                 | 2.0 | 39        | -2.1 | -28 | -1.0                | 2.3 | 37        | -2.5 | -25 | -1.0                 | 0.1  | 9         | -1.2 | -9  | -1.4            | 0.4  | 8         | -1.6 | -6  |
| India 2022                     | 0.0                | 0.9 | 13        | -0.3 | -5  | -0.1                 | 0.8 | 12        | -0.3 | -4  | 0.2                 | 0.8 | 11        | 0.0  | -3  | -0.2                 | 0.1  | 2         | -0.3 | -2  | 0.1             | 0.1  | 1         | 0.1  | -1  |
| Indonesia 2018                 | -0.8               | 1.5 | 24        | -1.4 | -10 | -0.5                 | 0.8 | 14        | -0.9 | -6  | -0.1                | 1.2 | 16        | -0.4 | -4  | -0.7                 | 0.4  | 8         | -1.0 | -5  | -0.3            | 0.7  | 10        | -0.5 | -4  |
| Iraq 2012                      | -0.8               | 0.3 | 5         | -1.0 | -4  | -0.5                 | 0.3 | 5         | -0.7 | -3  | -0.2                | 0.3 | 5         | -0.4 | -2  | -0.6                 | 0.0  | 1         | -0.7 | -1  | -0.3            | 0.0  | 0         | -0.3 | 0   |
| Kenya 2015                     | -1.5               | 1.7 | 33        | -2.6 | -23 | -0.2                 | 0.9 | 18        | -0.8 | -13 | 0.1                 | 2.3 | 33        | -1.1 | -17 | -1.6                 | -0.6 | 1         | -1.6 | -6  | -1.3            | 0.8  | 15        | -1.8 | -10 |
| Kinbati 2019                   | -1.9               | 0.8 | 31        | -3.0 | -37 | -0.4                 | 0.9 | 27        | -1.4 | -30 | -1.0                | 0.8 | 22        | -2.0 | -26 | -0.9                 | 0.0  | 9         | -0.9 | -11 | -1.5            | -0.1 | 5         | -1.5 | -7  |
| Malawi 2019                    | -3.1               | 1.1 | 29        | -4.3 | -29 | -0.7                 | 1.2 | 27        | -1.8 | -25 | -0.9                | 1.6 | 25        | -1.9 | -16 | -2.2                 | -0.5 | 4         | -2.3 | -13 | -2.4            | -0.1 | 2         | -2.5 | -4  |
| Mali 2018                      | -2.0               | 2.1 | 37        | -3.1 | -21 | -0.4                 | 1.4 | 26        | -1.2 | -15 | -0.5                | 1.3 | 18        | -1.1 | -9  | -1.4                 | 0.8  | 19        | -2.0 | -12 | -1.6            | 0.7  | 11        | -1.9 | -6  |
| Marshall Islands 2019          | -1.8               | 1.6 | 42        | -3.4 | -42 | -0.2                 | 1.6 | 39        | -1.7 | -39 | -1.2                | 1.2 | 27        | -2.9 | -39 | -0.7                 | 0.4  | 15        | -0.5 | -3  | -1.7            | 0.1  | 3         | -1.7 | -3  |
| Mexico 2020                    | -0.2               | 0.5 | 9         | -0.6 | -6  | -0.1                 | 0.4 | 7         | -0.3 | -4  | 0.1                 | 0.2 | 4         | 0.0  | -2  | -0.4                 | 0.3  | 5         | -0.6 | -4  | -0.1            | 0.1  | 2         | -0.2 | -3  |
| Myanmar 2015                   | -1.4               | 1.0 | 17        | -2.1 | -12 | -1.0                 | 1.0 | 17        | -1.6 | -11 | -0.2                | 1.3 | 18        | -0.7 | -6  | -1.2                 | -0.3 | -1        | -1.4 | -5  | -0.4            | 0.0  | -1        | -0.4 | -1  |
| Niger 2018                     | -2.2               | 1.5 | 36        | -3.2 | -25 | -0.3                 | 1.1 | 27        | -1.1 | -19 | -0.8                | 1.2 | 23        | -1.6 | -13 | -1.4                 | 0.2  | 13        | -1.6 | -11 | -1.9            | 0.4  | 9         | -2.1 | -6  |
| Nigeria 2018                   | -2.0               | 2.0 | 38        | -3.0 | -18 | -0.5                 | 1.5 | 27        | -1.2 | -13 | -0.2                | 1.8 | 24        | -0.9 | -9  | -1.8                 | 0.2  | 14        | -2.1 | -9  | -1.5            | 0.5  | 10        | -1.9 | -6  |
| Rwanda 2016                    | -1.6               | 1.3 | 32        | -2.2 | -14 | -0.5                 | 1.1 | 27        | -1.1 | -12 | -0.4                | 2.0 | 35        | -1.1 | -12 | -1.2                 | -0.7 | -3        | -1.1 | -2  | -1.0            | 0.2  | 5         | -1.1 | -2  |
| Senegal 2018                   | -1.5               | 1.4 | 25        | -2.1 | -11 | -0.7                 | 1.1 | 20        | -1.1 | -7  | -0.3                | 0.9 | 12        | -0.7 | -6  | -1.2                 | 0.6  | 13        | -1.4 | -4  | -0.8            | 0.3  | 5         | -1.0 | -3  |
| Sierra Leone 2018              | -0.9               | 1.7 | 31        | -1.6 | -12 | -0.2                 | 1.2 | 22        | -0.8 | -10 | -0.4                | 1.4 | 23        | -0.8 | -7  | -0.6                 | 0.3  | 7         | -0.8 | -5  | -0.7            | 0.5  | 8         | -0.8 | -2  |
| Tajikistan 2009                | -1.5               | 1.5 | 28        | -2.5 | -19 | 0.0                  | 1.5 | 25        | -1.1 | -19 | -0.3                | 2.0 | 29        | -1.6 | -18 | -1.1                 | -0.5 | -1        | -0.9 | -1  | -1.5            | 0.0  | 2         | -1.4 | 0   |
| Tanzania 2019                  | -1.2               | 1.5 | 32        | -2.6 | -31 | -0.3                 | 0.5 | 13        | -0.8 | -12 | 0.5                 | 1.3 | 21        | -0.2 | -10 | -1.7                 | 0.1  | 12        | -2.4 | -21 | -0.9            | 0.9  | 19        | -1.8 | -19 |
| Timor-Leste 2008               | -2.2               | 2.6 | 63        | -4.1 | -46 | -0.5                 | 0.8 | 23        | -1.3 | -21 | -1.2                | 2.7 | 51        | -3.2 | -37 | -1.0                 | -0.1 | 12        | -1.0 | -9  | -1.7            | 1.7  | 40        | -2.8 | -25 |
| Togo 2018                      | -0.9               | 2.2 | 44        | -2.4 | -30 | 0.1                  | 1.9 | 37        | -1.2 | -25 | 0.4                 | 1.8 | 28        | -0.6 | -15 | -1.2                 | 0.4  | 15        | -1.7 | -15 | -1.0            | 0.3  | 7         | -1.2 | -5  |
| Tunisia 2010                   | -1.5               | 1.1 | 17        | -2.4 | -12 | -0.8                 | 1.1 | 16        | -1.5 | -11 | -0.3                | 1.1 | 14        | -0.8 | -6  | -1.2                 | 0.0  | 3         | -1.6 | -6  | -0.8            | 0.1  | 1         | -0.9 | -1  |
| Uganda 2019                    | -1.1               | 1.5 | 33        | -2.2 | -25 | -0.1                 | 1.1 | 21        | -0.9 | -17 | -0.1                | 1.8 | 30        | -1.1 | -17 | -0.9                 | -0.3 | 3         | -1.1 | -8  | -0.9            | 0.5  | 11        | -1.3 | -8  |

Notes: RT1 are rural households from the poorest income tercile of a country, RT3 are rural households from the richest income tercile, UT1 are urban households from the richest income tercile, UT3 are urban households from the richest income tercile. ΔHDDS is the difference in healthy household dietary diversity between groups and Δ% is the difference in proportion sourced from own consumption and purchases between groups in percentage points.

**Table 3: Association between healthy household dietary diversity score (HDDS) and household demographic and socioeconomic characteristics by world region.**

|                                                  | (1)<br>East Asia<br>and Pacific | (2)<br>Central<br>Asia | (3)<br>Latin America<br>and Caribbean | (4)<br>Middle East<br>and North<br>Africa | (5)<br>South<br>Asia | (6)<br>Sub-<br>Saharan<br>Africa |
|--------------------------------------------------|---------------------------------|------------------------|---------------------------------------|-------------------------------------------|----------------------|----------------------------------|
| <b>HDDS</b>                                      |                                 |                        |                                       |                                           |                      |                                  |
| Cons. exp. per AE, log                           | 3.395***                        | 4.434***               | 2.349***                              | 3.681                                     | 3.573***             | 1.324***                         |
| Cons. exp. per AE, log, squared                  | -3.166***                       | -3.961***              | -2.324***                             | -3.344                                    | -3.420***            | -0.924***                        |
| Highest education in HH                          |                                 |                        |                                       |                                           |                      |                                  |
| Less than basic                                  | -0.089***                       | -0.056*                | -0.047***                             | -0.053                                    | -0.035***            | -0.088***                        |
| Basic                                            | ref. cat.                       | ref. cat.              | ref. cat.                             | ref. cat.                                 | ref. cat.            | ref. cat.                        |
| Intermediate                                     | 0.020***                        | 0.125*                 | -0.000                                | 0.074                                     | -0.016***            | 0.044***                         |
| Advanced                                         | 0.022***                        | 0.164***               | -0.060***                             | 0.112                                     | -0.064***            | 0.043***                         |
| Household size                                   | 0.267***                        | 0.214***               | 0.236***                              | 0.084                                     | 0.144***             | 0.200***                         |
| Age of household head                            | 0.023***                        | -0.007                 | 0.050**                               | 0.003                                     | 0.007                | 0.001                            |
| HH engaged in agricultural<br>activities (1=Yes) | -0.035***                       | 0.074**                | 0.013                                 | -0.035                                    | -0.059***            | 0.049***                         |
| Sex HHH (1=Female)                               | -0.015***                       | -0.035*                | 0.023*                                | -0.049                                    | -0.018*              | 0.036***                         |
| Location (1=Urban)                               | 0.076***                        | 0.108**                | 0.024                                 | 0.121                                     | -0.036***            | 0.033***                         |
| Observations                                     | 291,650                         | 6,598                  | 119,744                               | 4,183                                     | 245,836              | 186,197                          |
| <b>HDDS from purchases</b>                       |                                 |                        |                                       |                                           |                      |                                  |
| Cons. exp. per AE, log                           | 3.277***                        | 2.811***               | 2.477***                              | 3.379                                     | 3.384***             | 1.039***                         |
| Cons. exp. per AE, log, squared                  | -3.028***                       | -2.483***              | -2.419***                             | -3.064                                    | -3.240***            | -3.028***                        |
| Highest education in HH                          |                                 |                        |                                       |                                           |                      |                                  |
| Less than basic                                  | -0.110***                       | -0.021                 | -0.061***                             | -0.046                                    | -0.028***            | -0.091***                        |
| Basic                                            | ref. cat.                       | ref. cat.              | ref. cat.                             | ref. cat.                                 |                      |                                  |
| Intermediate                                     | 0.040***                        | 0.105*                 | 0.006                                 | 0.090                                     | -0.008*              | 0.044***                         |
| Advanced                                         | 0.040***                        | 0.126**                | -0.046***                             | 0.126                                     | -0.050***            | 0.045***                         |
| Household size                                   | 0.252***                        | 0.128***               | 0.241***                              | 0.079                                     | 0.101***             | 0.180***                         |
| Age of household head                            | -0.007                          | -0.026                 | 0.028                                 | -0.012                                    | -0.003               | -0.042***                        |
| HH engaged in agricultural<br>activities (1=Yes) | -0.087***                       | -0.099***              | -0.027*                               | -0.119                                    | -0.126***            | -0.084***                        |
| Sex HHH (1=Female)                               | -0.010*                         | -0.015                 | 0.022                                 | -0.041                                    | -0.010               | 0.032***                         |
| Location (1=Urban)                               | 0.125***                        | 0.359***               | 0.103***                              | 0.256                                     | 0.026**              | 0.149***                         |
| Observations                                     | 291,650                         | 6,598                  | 119,744                               | 4,183                                     | 245,836              | 186,197                          |
| <b>HDDS from own consumption</b>                 |                                 |                        |                                       |                                           |                      |                                  |
| Cons. exp. per AE, log                           | 0.570***                        | 1.082***               | -0.295**                              | -0.173                                    | 0.258**              | 0.884***                         |
| Cons. exp. per AE, log, squared                  | -0.628***                       | -0.978***              | 0.300***                              | 0.171                                     | -0.221*              | -0.804***                        |
| Highest education in HH                          |                                 |                        |                                       |                                           |                      |                                  |
| Less than basic                                  | 0.011*                          | -0.012                 | -0.003                                | -0.019                                    | -0.043***            | -0.022***                        |
| Basic                                            | ref. cat.                       | ref. cat.              | ref. cat.                             | ref. cat.                                 | ref. cat.            | ref. cat.                        |
| Intermediate                                     | -0.055***                       | 0.079                  | -0.006                                | -0.017                                    | 0.003                | -0.008*                          |
| Advanced                                         | -0.063***                       | 0.080                  | -0.015                                | -0.027                                    | 0.004                | -0.016***                        |
| Household size                                   | 0.025***                        | 0.109***               | 0.029                                 | 0.039                                     | 0.099***             | 0.092***                         |
| Age of household head                            | 0.070***                        | 0.056**                | 0.056***                              | 0.045                                     | 0.051***             | 0.052***                         |
| HH engaged in agricultural<br>activities (1=Yes) | 0.206***                        | 0.258***               | 0.206***                              | 0.251                                     | 0.269***             | 0.430***                         |
| Sex HHH (1=Female)                               | -0.004                          | -0.024                 | -0.025**                              | -0.034                                    | -0.023***            | -0.018***                        |
| Location (1=Urban)                               | -0.191***                       | -0.388***              | -0.240***                             | -0.406                                    | -0.232***            | -0.282***                        |
| Observations                                     | 291,650                         | 6,598                  | 119,744                               | 4,183                                     | 245,836              | 186,249                          |

*Continued on next page.*



184 *Table 3 continued.*

| <b>HDDS from gifts/in-kind</b>                |           |           |           |           |           |           |
|-----------------------------------------------|-----------|-----------|-----------|-----------|-----------|-----------|
| Cons. exp. per AE, log                        | 0.478     | -0.408    | 0.327     | -1.373    | 0.631***  | 0.332***  |
| Cons. exp. per AE, log, squared               | -0.436    | 0.405     | -0.422    | 1.239     | -0.791*** | -0.263*** |
| Highest education in HH                       |           |           |           |           |           |           |
| Less than basic                               | 0.038     | -0.031*   | 0.030***  | 0.014     | 0.002     | 0.010     |
| Basic                                         | ref. cat. | ref. cat. | ref. cat. | ref. cat. |           |           |
| Intermediate                                  | -0.035*   | -0.129*   | -0.023*** | -0.040    | -0.018*** | -0.025*** |
| Advanced                                      | -0.058**  | -0.146*   | -0.044*** | -0.050    | -0.081*** | -0.022*** |
| Household size                                | -0.028    | -0.063*   | -0.017*** | -0.055    | -0.049*** | -0.046*** |
| Age of household head                         | 0.066***  | -0.057    | 0.024***  | -0.024    | 0.052***  | 0.069***  |
| HH engaged in agricultural activities (1=Yes) | -0.017    | -0.030    | -0.010    | 0.006     | -0.004    | -0.008    |
| Sex HHH (1=Female)                            | 0.025     | 0.064**   | 0.035**   | 0.038     | 0.028***  | 0.077***  |
| Location (1=Urban)                            | -0.156*** | -0.047    | -0.061*** | -0.062    | -0.128*** | -0.090*** |
| Observations                                  | 11,127    | 6,598     | 119,744   | 4,183     | 236,872   | 157,684   |

185 Notes: This table depicts OLS regression coefficients of standardized healthy household dietary diversity from  
186 different sources on various standardized socioeconomic characteristics. We employ country-fixed effects, survey  
187 weights and clustered standard errors.  
188

**Table 4: Data sources for the main analysis.**

| Country name                     | Year or start year | Name of the survey                                                                                |
|----------------------------------|--------------------|---------------------------------------------------------------------------------------------------|
| Angola                           | 2018               | Encuesta de Hogares de Propósitos Múltiples (EHPM)                                                |
| Argentina                        | 2017               | Encuesta Nacional de Gastos de los Hogares                                                        |
| Armenia                          | 2018               | Integrated Living Conditions Survey                                                               |
| Barbados                         | 2016               | Barbados Survey of Living Conditions                                                              |
| Benin                            | 2018               | Enquête Harmonisée sur le Conditions de Vie des Ménages                                           |
| Bhutan                           | 2012               | Living Standards Survey                                                                           |
| Burkina Faso                     | 2018               | Enquête Harmonisée sur le Conditions de Vie des Ménages                                           |
| Colombia                         | 2016               | Encuesta Nacional de Presupuestos de los Hogares (ENPH)                                           |
| Cook Island                      | 2014               | Household Income and Expenditure Survey                                                           |
| Cote d'Ivoire                    | 2018               | Enquête harmonisée sur les conditions de vie des ménages (EHCVM)                                  |
| Democratic Republic of the Congo | 2012               | National Household Survey                                                                         |
| Dominican Republic               | 2018               | Encuesta Nacional de Gastos e Ingresos de los Hogares (ENGIH)                                     |
| Ecuador                          | 2011               | Encuesta Nacional de Ingresos y Gastos de Hogares Urbanos y Rurales                               |
| El Salvador                      | 2014               | Encuesta de Hogares de Propósitos Múltiples (EHPM)                                                |
| Ethiopia                         | 2019               | Socioeconomic Survey                                                                              |
| Gambia                           | 2015               | Integrated Household Survey                                                                       |
| Georgia                          | 2021               | Households Incomes and Expenditures Survey                                                        |
| Ghana                            | 2016               | Ghana Living Standard Survey                                                                      |
| Guinea-Bissau                    | 2018               | Inquérito Harmonizado sobre as Condições de vida dos Agregados Familiares                         |
| India                            | 2022               | Household Consumption and Expenditure Survey                                                      |
| Indonesia                        | 2018               | Survei Sosial Ekonomi Nasional                                                                    |
| Iraq                             | 2017               | Rapid Welfare Monitoring Survey                                                                   |
| Jamaica                          | 2019               | Jamaica Survey of Living Conditions                                                               |
| Kenya                            | 2015               | Kenya Integrated Household Budget Survey                                                          |
| Kiribati                         | 2019               | Household Income and Expenditure Survey                                                           |
| Liberia                          | 2016               | Household Income and Expenditure Survey                                                           |
| Malawi                           | 2019               | Fifth Integrated Household Survey                                                                 |
| Mali                             | 2018               | Enquête Harmonisée sur le Conditions de Vie des Ménages                                           |
| Marshall Islands                 | 2019               | Household Income and Expenditure Survey                                                           |
| Mexico                           | 2020               | National Survey of Household Income and Expenditure (ENIGH)                                       |
| Mongolia                         | 2021               | Household Socio-Economic Survey                                                                   |
| Myanmar                          | 2015               | Poverty and Living Conditions Survey                                                              |
| Niger                            | 2018               | Enquête Harmonisée sur le Conditions de Vie des Ménages                                           |
| Nigeria                          | 2018               | Living Standards Survey                                                                           |
| Rwanda                           | 2016               | Rwanda - Integrated Household Living Conditions Survey (EICV5), 2016-2017, Cross-Sectional Sample |
| Senegal                          | 2018               | Enquête Harmonisée sur le Conditions de Vie des Ménages                                           |
| Sierra Leone                     | 2018               | Integrated Household Survey                                                                       |

|             |      |                                                                                  |
|-------------|------|----------------------------------------------------------------------------------|
| Suriname    | 2016 | Survey of Living Conditions                                                      |
| Tajikistan  | 2009 | Living Standards Survey                                                          |
| Tanzania    | 2019 | National Panel Survey 2019-2020                                                  |
| Timor-Leste | 2008 | Survey of Living Standards 2007 and Extension 2008                               |
| Togo        | 2018 | Enquête Harmonisée sur le Conditions de Vie des Ménages                          |
| Tokelau     | 2015 | Household Income and Expenditure Survey                                          |
| Tunisia     | 2010 | Enquête Nationale sur le Budget, la Consommation et le Niveau de vie des ménages |
| Uganda      | 2019 | National Panel Survey (UNPS)                                                     |

**Table 5: Data availability by survey.**

| Country name           | (1) | (2) | (3) | (4) | (5) | (6) | (7) | (8) | (9) | (10) | (11) | (12) |
|------------------------|-----|-----|-----|-----|-----|-----|-----|-----|-----|------|------|------|
| Angola                 | yes  | yes  | yes  |
| Argentina              | no  | yes | yes | yes | yes | yes | no  | yes | yes | yes  | yes  | yes  |
| Armenia                | yes  | yes  | yes  |
| Barbados               | no  | yes  | yes  | yes  |
| Benin                  | yes  | yes  | yes  |
| Bhutan                 | yes  | yes  | no   |
| Burkina Faso           | yes  | yes  | yes  |
| Colombia               | yes  | yes  | yes  |
| Cook Island            | yes | yes | no  | yes | no  | yes | yes | yes | yes | yes  | yes  | no   |
| Cote d'Ivoire          | yes  | yes  | yes  |
| Dem. Rep. of the Congo | yes  | yes  | yes  |
| Dominican Republic     | no  | yes | yes | yes | yes | yes | no  | yes | yes | yes  | yes  | yes  |
| Ecuador                | yes  | yes  | yes  |
| El Salvador            | yes  | yes  | yes  |
| Ethiopia               | yes  | yes  | yes  |
| Gambia                 | no  | yes | yes | yes | yes | no  | no  | yes | yes | yes  | yes  | yes  |
| Georgia                | yes | no  | yes | yes  | yes  | yes  |
| Ghana                  | yes  | yes  | no   |
| Guinea-Bissau          | yes  | yes  | yes  |
| India                  | yes  | yes  | yes  |
| Indonesia              | yes  | yes  | no   |
| Iraq                   | yes | no  | yes | yes  | yes  | yes  |
| Jamaica                | no  | yes  | yes  | yes  |
| Kenya                  | yes  | yes  | yes  |
| Kiribati               | yes  | yes  | yes  |
| Liberia                | yes | yes | yes | yes | yes | no  | no  | yes | yes | yes  | yes  | yes  |
| Malawi                 | yes  | yes  | yes  |
| Mali                   | yes  | yes  | yes  |
| Marshall Islands       | yes  | yes  | yes  |
| Mexico                 | yes | yes | yes | yes | yes | no  | yes | yes | yes | yes  | yes  | yes  |
| Mongolia               | yes | yes | yes | yes | yes | yes | no  | yes | yes | yes  | yes  | yes  |
| Myanmar                | yes  | yes  | yes  |
| Niger                  | yes  | yes  | yes  |
| Nigeria                | yes  | yes  | yes  |
| Rwanda                 | yes  | yes  | no   |
| Senegal                | yes  | yes  | yes  |
| Sierra Leone           | yes  | yes  | yes  |
| Suriname               | no  | yes  | yes  | yes  |
| Tajikistan             | yes  | yes  | yes  |
| Tanzania               | yes  | yes  | yes  |

|              |           |           |           |           |           |           |           |           |           |           |           |           |
|--------------|-----------|-----------|-----------|-----------|-----------|-----------|-----------|-----------|-----------|-----------|-----------|-----------|
| Timor-Leste  | yes       |
| Togo         | yes       |
| Tokelau      | no        | yes       |
| Tunisia      | yes       |
| Uganda       | yes       |
| <b>Total</b> | <b>38</b> | <b>45</b> | <b>44</b> | <b>45</b> | <b>44</b> | <b>42</b> | <b>40</b> | <b>43</b> | <b>45</b> | <b>45</b> | <b>45</b> | <b>40</b> |

Notes: (1) Rural-urban location, (2) Household size, (3) Adult equivalents, (4) Sex of household head, (5) Age of household head, (6) Max. education of any household member, (7) Household income/expenditure, (8) Engagement in any agricultural activities, (9) Consumption, (10) Consumption from purchases, (11) Consumption from own production, (12) Consumption from gifts/in-kind.
